# Supplementary material for: Ankle osteoarthritis and its association with severe ankle injuries, ankle surgeries and health-related quality of life in recently retired professional male football and rugby players: a cross-sectional observational study
Source: PubMed Central journal article supplement (PMC7310999; doi:10.1136/bmjopen-2020-036775), 2020-06-21
Supplement: bmjopen-2020-036775.draft_revisions.pdf [file bmjopen-2020-036775.draft_revisions.pdf]

# BMJ Open

BMJ Open is committed to open peer review. As part of this commitment we make the peer review history of every article we publish publicly available.

When an article is published we post the peer reviewers' comments and the authors' responses online. We also post the versions of the paper that were used during peer review. These are the versions that the peer review comments apply to.

The versions of the paper that follow are the versions that were submitted during the peer review process. They are not the versions of record or the final published versions. They should not be cited or distributed as the published version of this manuscript.

BMJ Open is an open access journal and the full, final, typeset and author-corrected version of record of the manuscript is available on our site with no access controls, subscription charges or pay-per-view fees (<http://bmjopen.bmj.com>).

If you have any questions on BMJ Open's open peer review process please email [info.bmjopen@bmj.com](mailto:info.bmjopen@bmj.com)

# BMJ Open

## Ankle osteoarthritis and its association with severe ankle injuries, ankle surgeries and health-related quality of life in recently retired professional male football and rugby players

|                               |                                                                                                                                                                                                                                                                                                                                                                                                                                                                                                                                                                                                                                                                                                                                                                                                                                                                                                                                                                                                                                                                                                                                                                                                                                                                                                                                          |
|-------------------------------|------------------------------------------------------------------------------------------------------------------------------------------------------------------------------------------------------------------------------------------------------------------------------------------------------------------------------------------------------------------------------------------------------------------------------------------------------------------------------------------------------------------------------------------------------------------------------------------------------------------------------------------------------------------------------------------------------------------------------------------------------------------------------------------------------------------------------------------------------------------------------------------------------------------------------------------------------------------------------------------------------------------------------------------------------------------------------------------------------------------------------------------------------------------------------------------------------------------------------------------------------------------------------------------------------------------------------------------|
| Journal:                      | <i>BMJ Open</i>                                                                                                                                                                                                                                                                                                                                                                                                                                                                                                                                                                                                                                                                                                                                                                                                                                                                                                                                                                                                                                                                                                                                                                                                                                                                                                                          |
| Manuscript ID                 | bmjopen-2020-036775                                                                                                                                                                                                                                                                                                                                                                                                                                                                                                                                                                                                                                                                                                                                                                                                                                                                                                                                                                                                                                                                                                                                                                                                                                                                                                                      |
| Article Type:                 | Original research                                                                                                                                                                                                                                                                                                                                                                                                                                                                                                                                                                                                                                                                                                                                                                                                                                                                                                                                                                                                                                                                                                                                                                                                                                                                                                                        |
| Date Submitted by the Author: | 02-Jan-2020                                                                                                                                                                                                                                                                                                                                                                                                                                                                                                                                                                                                                                                                                                                                                                                                                                                                                                                                                                                                                                                                                                                                                                                                                                                                                                                              |
| Complete List of Authors:     | <p>Paget, Liam; Amsterdam UMC - Locatie AMC, Orthopaedic surgery; Amsterdam Collaboration for Health and Safety in Sports, AMC/VUMC IOC Research Center (ACHSS)</p> <p>Aoki, Haruhito; St. Marianna University School of Medicine; Yokohama City Sports Medical Center</p> <p>Kemp, Simon; Rugby Football Union, Sports Medicine</p> <p>Lambert, Mike; University of Cape Town, UCT/MRC Research Unit for Exercise Science and Sports Medicine</p> <p>Readhead, Clint; South Africa Rugby Union, Medical; University of Cape Town Division of Exercise Science and Sports Medicine</p> <p>Stokes, Keith; University of Bath, Department for Health; Rugby Football Union,</p> <p>Viljoen, Wayne; South African Rugby Union, Medical; University of Cape Town Division of Exercise Science and Sports Medicine</p> <p>Reurink, G; Sports Medicine, OLVG, The Sport Physician Group; Academic Center for Evidence-based Sports medicine (ACES)</p> <p>Tol, J; Academic Center for Evidence-Based Sports medicine (ACES); Aspetar Orthopaedic and Sports Medicine Hospital</p> <p>Kerkhoffs, Gino; Amsterdam UMC - Locatie AMC, Orthopaedic surgery; Amsterdam Collaboration for Health and Safety in Sports (ACHSS)</p> <p>Gouttebauge, Vincent; Amsterdam UMC - Locatie AMC, Orthopaedic surgery; Football Players Worldwide (FIFPRO)</p> |
| Keywords:                     | <p>EPIDEMIOLOGY, ORTHOPAEDIC &amp; TRAUMA SURGERY, Foot &amp; ankle &lt; ORTHOPAEDIC &amp; TRAUMA SURGERY, Orthopaedic sports trauma &lt; ORTHOPAEDIC &amp; TRAUMA SURGERY, SPORTS MEDICINE</p>                                                                                                                                                                                                                                                                                                                                                                                                                                                                                                                                                                                                                                                                                                                                                                                                                                                                                                                                                                                                                                                                                                                                          |
|                               |                                                                                                                                                                                                                                                                                                                                                                                                                                                                                                                                                                                                                                                                                                                                                                                                                                                                                                                                                                                                                                                                                                                                                                                                                                                                                                                                          |

SCHOLARONE™  
Manuscripts

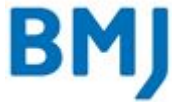

I, the Submitting Author has the right to grant and does grant on behalf of all authors of the Work (as defined in the below author licence), an exclusive licence and/or a non-exclusive licence for contributions from authors who are: i) UK Crown employees; ii) where BMJ has agreed a CC-BY licence shall apply, and/or iii) in accordance with the terms applicable for US Federal Government officers or employees acting as part of their official duties; on a worldwide, perpetual, irrevocable, royalty-free basis to BMJ Publishing Group Ltd ("BMJ") its licensees and where the relevant Journal is co-owned by BMJ to the co-owners of the Journal, to publish the Work in this journal and any other BMJ products and to exploit all rights, as set out in our [licence](#).

The Submitting Author accepts and understands that any supply made under these terms is made by BMJ to the Submitting Author unless you are acting as an employee on behalf of your employer or a postgraduate student of an affiliated institution which is paying any applicable article publishing charge ("APC") for Open Access articles. Where the Submitting Author wishes to make the Work available on an Open Access basis (and intends to pay the relevant APC), the terms of reuse of such Open Access shall be governed by a Creative Commons licence – details of these licences and which [Creative Commons](#) licence will apply to this Work are set out in our licence referred to above.

Other than as permitted in any relevant BMJ Author's Self Archiving Policies, I confirm this Work has not been accepted for publication elsewhere, is not being considered for publication elsewhere and does not duplicate material already published. I confirm all authors consent to publication of this Work and authorise the granting of this licence.

1  
2  
3 **1 Ankle osteoarthritis and its association with severe ankle injuries, ankle surgeries and health-related**  
4  
5 **2 quality of life in recently retired professional male football and rugby players**  
6

7  
8 3 Liam D. A. Paget<sup>1,2,3</sup>, Haruhito Aoki<sup>4, 5</sup>, Simon Kemp<sup>6</sup>, Mike Lambert<sup>7</sup>, Clint Readhead<sup>7, 8</sup>, Keith Stokes<sup>6, 9, 10</sup>,  
9  
10 4 Wayne Viljoen<sup>7, 8</sup>, Gustaaf Reurink<sup>1,2,3,11</sup>, Johannes L. Tol<sup>2,3,12</sup>, Gino M. M. J. Kerkhoffs<sup>1,2,3</sup>, Vincent  
11  
12 5 Gouttebarga<sup>1,2,3,4,13</sup>  
13

14  
15 6  
16  
17 7 <sup>1</sup> Amsterdam UMC, University of Amsterdam, Department of Orthopaedic Surgery, Amsterdam  
18  
19 8 Movement Sciences, Meibergdreef 9, Amsterdam, the Netherlands

20  
21 9 <sup>2</sup> Academic Center for Evidence based Sports medicine (ACES), The Netherlands; Amsterdam

22  
23 10 <sup>3</sup> Amsterdam Collaboration on Health & Safety in Sports (ACHSS), AMC/VUmc IOC Research Center of  
24  
25 11 Excellence, Amsterdam, The Netherlands

26  
27  
28 12 <sup>4</sup> St. Marianna University School of Medicine, Kawasaki, Japan

29  
30 13 <sup>5</sup> Yokohama City Sports Medical Center, Yokohama, Japan

31  
32 14 <sup>6</sup> Rugby Football Union, Twickenham, UK

33  
34 15 <sup>7</sup> Division of Exercise Science and Sports Medicine (ESSM), University of Cape Town, Cape Town, South  
35  
36 16 Africa

37  
38  
39 17 <sup>8</sup> South African Rugby Union (SARU), Cape Town, South Africa

40  
41 18 <sup>9</sup> Department for Health, University of Bath, Bath, UK

42  
43 19 <sup>10</sup> Centre for Sport, Exercise and Osteoarthritis Research Versus Arthritis

44  
45 20 <sup>11</sup> The Sport Physician Group, Department of Sports Medicine, OLVG, Amsterdam, The Netherlands

46  
47 21 <sup>12</sup> Aspetar, Orthopaedic and Sports Medicine Hospital, Doha, Qatar

48  
49 22 <sup>13</sup> Football Players Worldwide (FIFPRO), Hoofddorp, The Netherlands

50  
51  
52 23  
53  
54  
55  
56  
57  
58  
59  
60

1  
2  
3 24 **Abstract**  
4

5 25 **Objectives**  
6

7 26 To determine (i) the prevalence of ankle osteoarthritis (OA) among former professional football and  
8  
9  
10 27 rugby players, (ii) assess the association between ankle injuries or ankle surgeries with ankle OA, and (iii)  
11  
12 28 compare the mental and physical quality of life (QoL) between former professional football and rugby  
13  
14 29 players with and without OA.  
15

16 30

17  
18 31 **Methods**  
19

20  
21 32 We conducted a questionnaire based observational study with a cross-sectional design. Former  
22  
23 33 professional football and rugby players were recruited by the football players worldwide (FIFPRO) and  
24  
25 34 the International Rugby Players (IRP). Information concerning ankle OA, sustained ankle injuries and  
26  
27 35 ankle surgeries was gathered (medical record or team doctor). Health related QoL was assessed using  
28  
29 36 the PROMIS physical and mental health scores.  
30  
31

32 37

33  
34 38 **Results**  
35

36  
37 39 Overall, 553 former professional football (n = 401) and rugby players (n = 152) were enrolled in the  
38  
39 40 study (response rate of 56%). Ankle OA prevalence among former professional football and rugby  
40  
41 41 players was 9.2% and 4.6%, respectively. Football players were more likely to suffer from ankle OA  
42  
43 42 following every ankle injury and/or surgery. Football and rugby players with ankle OA had similar  
44  
45 43 PROMIS physical and mental health scores to the norm for the general population.  
46  
47

48 44

49  
50 45 **Conclusion**  
51

52 46 Former professional football and rugby players had a higher ankle OA prevalence than the general  
53  
54 47 population (3.4%). Football players are more likely to suffer from ankle OA following every ankle injury  
55  
56  
57  
58  
59  
60

1  
2  
3 48 and/or surgery. No clinical relevant difference was seen for physical or mental health related QoL among  
4  
5 49 football and rugby players. Preventive measures for ankle injuries are recommended.  
6  
7

8 50  
9 51 ***Strengths and limitations***

- 10  
11 52 - Overall good response rate (56%) and a large group of participating football players (401)  
12  
13  
14 53 - This study had a cross-sectional design, therefore no causal-association can be determined  
15  
16  
17 54 - There were only 7 rugby players with OA, implying a potential serious type II error.  
18  
19  
20 55 - Research based (retrospective) questionnaires are dependent on the accuracy and  
21  
22 56 understanding of the participant. Professional athletes might generally remember the number  
23  
24 57 of severe ankle injuries or surgeries resulting in a training or match absence of  $\geq 4$  weeks.  
25  
26  
27 58 However, we cannot exclude that participants were not able to precisely recall all their  
28  
29 59 sustained severe ankle injuries and ankle surgeries or that they did not consult their last (team)  
30  
31 60 doctor  
32  
33  
34 61 - Our OA definition did not include a clinical and radiological evaluation.  
35  
36  
37 62

## 63 **Background**

64 Football and Rugby Union (hereafter 'rugby') are among the most popular team sports worldwide. In  
65 both sports, ankle injuries represent a significant proportion of the total injuries sustained.<sup>1-5</sup> Previous  
66 ankle injuries are an important risk factor for ankle osteoarthritis (OA).<sup>6,7</sup>  
67  
68 Drawer et al. (2002) estimates the overall risk of injury in professional football to be 1,000 times higher  
69 than in high-risk industrial occupations, with ankle injuries contributing 10-18% of all injuries.<sup>2,8</sup> The  
70 Union of European Football Associations (UEFA) Champions League Injury Study reported an overall  
71 ankle injury rate of 1 injury per 1000 hours.<sup>2</sup> Lateral ankle sprains (51%) were the most prevalent sub-  
72 type of ankle injuries.<sup>2</sup> In professional rugby, epidemiological studies show that ankle injuries contribute  
73 5-20% of all injuries.<sup>1,3,9,10</sup> Similar to professional football, lateral ankle sprains are the most common  
74 ankle injuries with an injury rate of 3.8 - 4.5 injuries per 1,000 player hours depending on the position on  
75 the field.<sup>11</sup>

76  
77 Two retrospective cohort studies from the general population (n = 390 and n = 639 patients  
78 respectively), reported that 70-78% of ankle OA cases were associated with a previously sustained ankle  
79 injury. These previous injuries included fractures, isolated osteochondral defects of the talus and ankle  
80 ligament injuries.<sup>6,7</sup> Among these post-traumatic ankle OA cases, 28% were associated with a previously  
81 sustained ligamentous injury.<sup>7</sup> To our knowledge, there are no prospective studies on the association of  
82 ankle injuries and ankle OA.

83  
84 In the general population the prevalence of ankle OA is estimated to be 3.4% in people over 50 years of  
85 age.<sup>12</sup> The reported prevalence of ankle OA 16 to 22 years after a professional football career is 12-  
86 19%.<sup>13-15</sup> No data are available for ankle OA among former professional rugby players. In comparison to

1  
2  
3 87 a general population control group, the prevalence of OA in any joint and the incidence of joint  
4  
5 88 replacement for any joint was estimated to be 4 and 6 times higher, respectively, among former elite  
6  
7 89 rugby players.<sup>16</sup> This has been associated with a significantly poorer mental and physical health-related  
8  
9  
10 90 quality of life (QoL).<sup>16</sup>  
11

12 91  
13  
14 92 Several other studies report the association of general OA with mental health symptoms and physical  
15  
16 93 health-related QoL among former elite athletes across professional team sports including football and  
17  
18 94 rugby.<sup>17,18</sup> Therefore, the impact of OA on retired players must be considered. To date, the  
19  
20  
21 95 epidemiological evidence concerning the prevalence of ankle OA in professional football is either  
22  
23 96 outdated or limited, and in the case of rugby non-existent, while data on the association between  
24  
25 97 previous ankle injury and ankle OA is scarce in both sports.  
26  
27

28 98  
29  
30 99 The objective of this study was threefold. Firstly, to evaluate the prevalence of ankle OA in recently  
31  
32 100 retired professional football and rugby players. Secondly, to determine the association between ankle  
33  
34 101 injury and/or ankle surgery and ankle OA. Thirdly, to compare the mental and physical QoL in players  
35  
36 102 with and without ankle OA. Our hypotheses were that (i) recently retired professional football and rugby  
37  
38 103 players have a higher ankle OA prevalence than the general population (as found in the literature), (ii)  
39  
40 104 ankle injuries and/or ankle surgeries are associated with ankle OA, and (iii) the mental and physical QoL  
41  
42  
43 105 of recently retired professional football and rugby players with OA is lower compared to those players  
44  
45 106 without OA.  
46  
47

48 107  
49  
50  
51  
52  
53  
54  
55  
56  
57  
58  
59  
60



1  
2  
3 109 **Methods**

4  
5 110 **Design**

6  
7  
8 111 We conducted a questionnaire based observational study with a cross-sectional design. Ethical approval  
9  
10 112 for the study was provided by the Ethical Committee of the Yokohama City Sports Medical Center (17.003;  
11  
12 113 Yokohama, Japan) and the Medical Ethics Review Committee of the Academic Medical Center  
13  
14 114 (W16\_366#16.431; Amsterdam, The Netherlands). The study was reported according to the  
15  
16 115 'Strengthening the Reporting of Observational Studies in Epidemiology' statement and conducted in  
17  
18 116 accordance with the Declaration of Helsinki (2013).<sup>19</sup>

19  
20  
21 117  
22  
23 118 **Participants**

24  
25 119 Retired professional football and rugby players were randomly recruited to reduce recruitment bias, by  
26  
27 120 the Football Players Worldwide (FIFPRO) and the International Rugby Players (IRP). Inclusion criteria were:  
28  
29 121 (a) being a retired male professional football or rugby player; (b) being younger than 50 years of age; (c)  
30  
31 122 being able to read and comprehend texts in English, French or Spanish.

32  
33  
34 123  
35  
36 124 The definition of a retired professional football or rugby player was that he (i) has trained to improve  
37  
38 125 performances, (ii) has competed in the highest or second highest national league, and (iii), has had training  
39  
40 126 and competition as a major activity (way of living) or focus of personal interest, devoting several hours in  
41  
42 127 all or most of the days for these activities, and exceeding the time allocated to other types of professional  
43  
44 128 or leisure activities. If interested, players received information about the study, gave their informed  
45  
46 129 consent and completed an electronic questionnaire. Once completed, the electronic questionnaires were  
47  
48 130 saved automatically on a secured electronic server that only the principal investigator could access.

49  
50  
51 131  
52  
53  
54 132 Sample size calculation for ankle OA prevalence indicated that 138 participants per sport were needed  
55  
56  
57  
58  
59  
60

1  
2  
3 133 (power of 80%, confidence interval of 95%; absolute precision of 5%) under the assumption of an  
4  
5 134 anticipated population proportion of 10%.<sup>20</sup> Expecting a response rate of approximately 50%, we intended  
6  
7 135 to reach at least 300 participants per sport.  
8  
9

10 136

11  
12 137 ***Dependent variable: Ankle osteoarthritis***  
13

14 138 The clinical diagnosis of ankle OA by a medical professional was retrospectively determined using a single  
15  
16 139 question ('Have you been diagnosed with ankle osteoarthritis by a medical professional?'). Participants  
17  
18 140 were given the definition of ankle OA (based on the NICE criteria; adapted for age), determined as the  
19  
20 141 damage of the ankle joint's cartilage that leads to activity-related joint pain with either no morning joint-  
21  
22 142 related stiffness or morning stiffness that lasts no longer than 30 minutes.<sup>21</sup> For this question, participants  
23  
24 143 were requested to consult either their medical record or their most recent medical professional.  
25  
26  
27

28 144

29  
30 145 ***Independent variable: Severe ankle injury and related surgery***  
31

32 146 History of a severe ankle injury during their professional football or rugby career was examined through  
33  
34 147 a single question for the sequential recording of single or multiple injury events over time. Similarly,  
35  
36 148 history of an ankle related surgery was recorded through a single question for the sequential recording of  
37  
38 149 a single or multiple ankle surgeries over time. In our study, a severe ankle injury was defined as an injury  
39  
40 150 that involved the ankle joint, occurred during team activities (training or match), and led to absence from  
41  
42 151 either training or a match for more than 28 days<sup>18,19</sup>. For this question, participants were requested to  
43  
44 152 consult either their medical records or their most recent medical doctor.  
45  
46  
47

48 153

49  
50 154 ***Health-related quality of life***  
51

52 155 The Patient-Reported Outcomes Measurement Information System Global Health short form (PROMIS-  
53  
54 156 GH) assesses multiple domains related to health-related quality of life such as health, functioning, pain,  
55  
56  
57  
58  
59

1  
2  
3 157 social activities and fatigue.<sup>20</sup> The PROMIS-GH has been validated in several populations and languages  
4  
5 158 among which are English, French and Spanish (for detailed information, see [www.nihpromis.org](http://www.nihpromis.org)).<sup>20</sup> The  
6  
7 159 Global Mental Health and Global Physical Health scores were calculated based on 10 items each measured  
8  
9  
10 160 on a 5-point scale (from 1 to 5) and subsequently converted.<sup>20</sup> These subscale scores ranged from 0 to  
11  
12 161 100, with a higher score indicating better quality of life and a mean score of 50 indicating the norm for  
13  
14 162 the general population.<sup>22</sup>

163

### 164 **Procedures**

165 An anonymous questionnaire (electronic and/or paper) available in English, French and Spanish was  
166 compiled (LimeSurvey Professional). It included the following descriptive variables: age, body-height,  
167 body-weight, duration of professional football or rugby career, level of play, duration and nature of  
168 retirement, and current employment status (employed or not employed). Additionally, this questionnaire  
169 included questions for the outcomes previously elaborated on (ankle OA, ankle injury, ankle surgery, QoL).  
170 Information about the study was sent per email to potential participants by FIFPRO and IRP. Participants  
171 interested in the study, gave their informed consent and completed the electronic questionnaire.  
172 Participants were asked to complete the questionnaire within 2 weeks, reminders being sent after 2 and  
173 4 weeks. For privacy reasons, the responses to the questionnaires were coded and anonymized. Once  
174 completed, the electronic questionnaires were automatically saved on a secured electronic server that  
175 only the principal investigator could access. Players participated voluntarily and did not receive any  
176 reward for their participation.

177

### 178 **Statistical analyses**

179 Data analysis was performed using the statistical software IBM SPSS 24.0 for Windows. Analyses were  
180 conducted separately for retired professional football and rugby players. Data were assessed (visually) for

1  
2  
3 181 normality and presented as mean  $\pm$  standard deviation (SD), median (interquartile range [IQR]), or  
4  
5 182 frequency (proportion in %) as appropriate. Body mass index (BMI) was calculated using the provided  
6  
7 183 weight and height of participants ( $\text{kg}/\text{m}^2$ ). Prevalence of ankle OA, overall and within the age categories  
8  
9 184 of  $\leq 40$  years and  $>40$  years, was calculated as the proportion of the number of participants with ankle OA  
10  
11 185 relative to the total number of participants in each category.<sup>20</sup> A logistic regression analysis was performed  
12  
13 186 to determine the association of the number of severe ankle injuries and/or ankle surgeries (continuous  
14  
15 187 independent variable) with ankle OA (dichotomous dependent variable). Severe ankle injuries and or  
16  
17 188 ankle-related surgeries were also expressed using 3 pre-determined categories (0, 1 and  $>1$ ). This was  
18  
19 189 adjusted for age and BMI, both having been identified as risk factors for OA.<sup>23,24</sup> Descriptive analyses of  
20  
21 190 health-related quality of life (Global Physical Health and Global Mental Health) were conducted, while  
22  
23 191 comparisons between groups (retired players with ankle OA vs. retired players without ankle OA) were  
24  
25  
26  
27 192 made using a Mann-Whitney U test for independent samples.<sup>20</sup>

29  
30 193  
31 194  
32  
33  
34  
35  
36  
37  
38  
39  
40  
41  
42  
43  
44  
45  
46  
47  
48  
49  
50  
51  
52  
53  
54  
55  
56  
57  
58  
59  
60

1  
2  
3 195 **Results**

4  
5 196 ***Participants***

6  
7 197 From a total of 750 football and 326 rugby players contacted, respectively 401 and 152 gave their

8  
9 198 written informed consent and completed the questionnaire (overall response rate of 56%).

10  
11 199 Characteristics of the two groups including the pre-determined sub-categories for severe ankle injuries

12  
13 200 and ankle surgeries (0, 1 and >1) are illustrated in Table 1.

14  
15 201

16  
17 202 ***Prevalence of ankle osteoarthritis, severe injury and surgery***

18  
19 203 The prevalence of patient reported ankle OA (including the pre-determined categories of ≤ 40 years

20  
21 204 and > 40 years) among recently retired professional football and rugby players, is presented in Table 2.

22  
23 205 The prevalence of ankle OA in former professional football players was 9.2% (n = 37). Overall, 94% of

24  
25 206 players with ankle OA were documented to have sustained ≥1 ankle injury and 62% had undergone ≥1

26  
27 207 ankle surgery. In the non-OA group (n = 364), 54% had sustained ≥1 ankle injury and 14% had

28  
29 208 undergone ≥1 ankle surgery. Logistic regression analysis (Table 3) showed that football players who

30  
31 209 had sustained a severe ankle injury were 1.3 (95%CI: 1.1 - 1.6) times more likely to report ankle OA (p <

32  
33 210 0.001). Football players who had undergone ankle surgery were 2.1 (95%CI: 1.4 – 3.1) times more likely

34  
35 211 to report ankle OA (p < 0.001).

36  
37 212

38  
39 213 The prevalence of ankle OA in former professional rugby players was 4.6% (n = 7). Overall, six out of

40  
41 214 seven (86%) rugby players with ankle OA reported to have sustained ≥1 ankle injury and four out of

42  
43 215 seven (57.1%) had undergone ≥1 ankle surgery. In the non-OA group (n = 145), 58.2% had sustained ≥1

44  
45 216 ankle injury and 18.4% had undergone ≥1 ankle surgery. Logistic regression analysis (Table 3) showed no

46  
47 217 significant association between either severe ankle injuries (OR = 1.1 95%CI: 0.8 – 1.5) or ankle surgeries

48  
49 218 (OR = 2.0 95%CI: 0.8 – 4.7) and ankle OA among former professional rugby players.

Table 1: Descriptive characteristics of recently retired professional football players and rugby players

|                                                                     | Football                       |                              |                                | Rugby                          |                                 |                                 |
|---------------------------------------------------------------------|--------------------------------|------------------------------|--------------------------------|--------------------------------|---------------------------------|---------------------------------|
|                                                                     | Total<br>(n = 401)             | Ankle OA<br>(n = 37)         | No ankle OA<br>(n = 364)       | Total<br>(n = 152)             | Ankle OA<br>(n = 7)             | No ankle OA<br>(n = 145)        |
| Age in years *<br>(median; IQR; min-max /<br>mean ± SD)             | 36<br>(32-40; 25-50)           | 39<br>(36-42; 27-49)*        | 36<br>(32-40; 25-50)*          | 40 ± 6                         | 41 ± 7                          | 40 ± 6                          |
| Height in cm<br>(mean ± SD / median; IQR;<br>min-max)               | 181 ± 7                        | 180 ± 7                      | 182 ± 7                        | 186<br>(180-191; 166-203)      | 191<br>(173-192; 172-192)       | 186<br>(180-191; 166-203)       |
| Weight in kg<br>(in kg (mean ± SD))                                 | 82 ± 9                         | 82 ± 13                      | 82 ± 9                         | 100<br>(91-114; 59-170)        | 108<br>(89-123; 82-130)         | 100<br>(91-113; 59-170)         |
| BMI in kg/m <sup>2</sup><br>(median; IQR; min-max))                 | 24.8<br>(23.5-26.2; 20.1-32.7) | 24.8<br>(22.9-26.6; 20.3-29) | 24.7<br>(23.5-26.1; 20.1-32.7) | 29.0<br>(27.1-31.4; 20.4-52.5) | 32.2<br>(28.5-33.7; 27.4-35.3)* | 28.9<br>(27.0-31.2; 20.4-52.5)* |
| Employed in %<br>(n)                                                | 89%<br>(350)                   | 92%<br>(33)                  | 89%<br>(317)                   | 91%<br>(139)                   | 86%<br>(6)                      | 92%<br>(133)                    |
| Professional career duration<br>in years (median; IQR; min-<br>max) | 13<br>(10-15; 2-19)            | 13<br>(12-16; 5-18)          | 13<br>(9-15; 2-19)             | 10<br>(7-15; 2-20)             | 10<br>(8-12.5; 8-13)            | 10<br>(7-15; 2-20)              |
| Retirement duration in years<br>(median; IQR; min-max)              | 4<br>(2-7; 1-17)               | 5<br>(3-9; 1-12)             | 4<br>(2-7; 1-17)               | 8<br>(3-12; 0-22)              | 12<br>(2-16; 1-19)              | 8<br>(4-11; 0-22)               |
| Level of play top league; %<br>(n)                                  | 81%<br>(314)                   | 92%<br>(34)                  | 80%<br>(280)                   | 80%<br>(106)                   | 86%<br>(6)                      | 80%<br>(100)                    |
| Forced retirement %<br>(n)                                          | 29%<br>(113)                   | 27%<br>(10)                  | 30%<br>(103)                   | 36%<br>(55)                    | 57%<br>(4)                      | 35%<br>(51)                     |
| Severe ankle injuries<br>(median; IQR; min-max)                     | 1<br>(0-2; 0-10)               | 2<br>(1-3; 0-10)             | 1<br>(0-2; 0-10)               | 1<br>(0-2; 0-20)               | 1<br>(1-2; 0-3)                 | 1<br>(0-2; 0-20)                |
| Ankle surgeries<br>(median; IQR; min-max)                           | 0<br>(0-0; 0-5)                | 1<br>(0-2; 0-5)              | 0<br>(0-0; 0-5)                | 0<br>(0-0; 0-4)                | 1<br>(0-1; 0-2)                 | 0<br>(0-0; 0-4)                 |

1  
2  
3  
4  
5  
6  
7  
8  
9  
10  
11  
12  
13  
14  
15  
16  
17  
18  
19  
20  
21  
22  
23  
24  
25  
26  
27  
28  
29  
30  
31  
32  
33  
34  
35  
36  
37  
38  
39  
40  
41  
42  
43  
44  
45  
46  
47

---

\* Statistically significant difference between ankle OA and no ankle OA. Abbreviations: OA = Osteoarthritis; IQR = interquartile range; n = number

For peer review only

Table 2: Subcategories for prevalence of reported ankle OA, severe injuries and ankle surgeries in retired football and rugby players

|                                     | Football            |                         |                        | Rugby              |                        |                        |
|-------------------------------------|---------------------|-------------------------|------------------------|--------------------|------------------------|------------------------|
|                                     | Total<br>(n = 401)* | ≤ 40 years<br>(n = 271) | > 40 years<br>(n = 83) | Total<br>(n = 152) | ≤ 40 years<br>(n = 82) | > 40 years<br>(n = 66) |
| Prevalence ankle OA in % (95%CI)    | 9.2% (6.4 – 12.1)   | 8.5% (5.2 – 11.8)       | 12.0% (5.0 – 19.1)     | 4.6% (1.2 – 8.0)   | 2.4% (0.9 – 5.8)       | 4.5% (0.5 – 9.6)       |
|                                     | 0 ankle injuries    | 1 ankle injury          | > 1 ankle injury       | 0 ankle injuries   | 1 ankle injury         | > 1 ankle injury       |
| Severe ankle injuries total (% (n)) | 42.5% (156)         | 25.3% (93)              | 32.2% (118)            | 40.5% (60)         | 27.7% (41)             | 31.8% (47)             |
| - With ankle OA (% (n))             | 5.7% (2)            | 28.6% (10)              | 65.7% (23)             | 14.3% (1)          | 42.9% (3)              | 42.9% (3)              |
| - Without ankle OA (% (n))          | 46.4% (154)         | 25.0% (83)              | 28.6% (95)             | 41.8% (59)         | 27.0% (38)             | 31.2% (44)             |
|                                     | No ankle surgeries  | 1 ankle surgery         | > 1 ankle surgery      | No ankle surgeries | 1 ankle surgery        | > 1 ankle surgery      |
| Ankle surgeries total in % (n)      | 81.5% (299)         | 10.9% (40)              | 7.6% (28)              | 79.7% (118)        | 15.5% (23)             | 4.7% (7)               |
| - With ankle OA % (n)               | 38.2% (13)          | 29.4% (10)              | 32.4% (11)             | 42.9% (3)          | 42.9% (3)              | 14.3% (1)              |
| - Without ankle OA % (n)            | 85.9% (286)         | 9% (30)                 | 5.1% (17)              | 81.6% (115)        | 14.2% (20)             | 4.3% (6)               |

\*The sum of patients in the subcategories ≤ 40 years and > 40 years does not equal the "Total number of participants" due to missing data (regarding age).

Abbreviations: OA = Osteoarthritis; n = number; CI = confidence interval;



1  
2  
3  
4  
5  
6  
7  
8  
9  
10  
11  
12  
13  
14  
15  
16  
17  
18  
19  
20  
21  
22  
23  
24  
25  
26  
27  
28  
29  
30  
31  
32  
33  
34  
35  
36  
37  
38  
39  
40  
41  
42  
43  
44  
45  
46  
47

Table 3: Association (odds ratio and 95% CI) of severe ankle injury and ankle surgery with ankle osteoarthritis among recently retired professional football and rugby players

|                                 | Football (n = 401) |                       | Rugby (n = 152)  |                       |
|---------------------------------|--------------------|-----------------------|------------------|-----------------------|
|                                 | Unadjusted         | Adjusted <sup>ψ</sup> | Unadjusted       | Adjusted <sup>ψ</sup> |
| Severe ankle injury (OR, 95%CI) | 1.34 (1.17-1.53)   | 1.33 (1.14-1.55)      | 1.01 (0.74-1.38) | 1.05 (0.75-1.47)      |
| Ankle surgery (OR, 95%CI)       | 2.20 (1.61-3.00)   | 2.09 (1.41-3.08)      | 1.99 (0.92-4.3)  | 1.96 (0.81-4.71)      |

<sup>ψ</sup>Adjusted for age and body mass index (BMI); Abbreviations: OR = Odds Ratio; n = number; CI = confidence interval

219

For peer review only

221 **Mental and physical QoL**

222

223 For the PROMIS physical health score a statistically significant lower outcome was found for football ( $p = 0.01$ ) and rugby players ( $p = 0.009$ ) with

224 OA (48 and 45 points respectively) compared to players without OA (51 and 51 points respectively). The PROMIS mental health score was not

225 significantly different between players with OA vs players without OA. Data is presented in Table 4.

226

227

228

219 *Table 4: Mental and physical quality of life (0-100) of recently retired football and rugby players with ankle OA compared to players without ankle OA*

|                                                           | Football           |                           |                               |         | Rugby              |                          |                               |         |
|-----------------------------------------------------------|--------------------|---------------------------|-------------------------------|---------|--------------------|--------------------------|-------------------------------|---------|
|                                                           | Total<br>(n = 401) | With ankle OA<br>(n = 37) | Without ankle OA<br>(n = 364) | p-value | Total<br>(n = 152) | With ankle OA<br>(n = 7) | Without ankle OA<br>(n = 145) | p-value |
| <i>PROMIS mental health<br/>(median; IQR; min-max)</i>    | 51; 46-56; 31-68   | 51; 46-53; 31-63          | 53; 46-56; 31-68              | 0.251   | 52; 46-56; 28-68   | 48; 48-53; 46-56         | 53; 46-56; 28-68              | 0.567   |
| <i>PROMIS Physical health*<br/>(median; IQR; min-max)</i> | 51; 46-56; 27-68   | 48; 42-54; 35-62*         | 51; 48-58; 27-68*             | 0.010   | 51; 45-54; 30-68   | 45; 37-48; 37-51*        | 51; 37-56; 30-68*             | 0.009   |

31 *\*Statistically significant difference; Abbreviations: OA = Osteoarthritis; IQR = Interquartile range; n = number*

33 229

36 230

Table 5: Post-Hoc analysis regarding mental and physical quality of life of recently retired football and rugby players who reported to have been forced to retire, and quality of life of players who reported to have been forced to retire with ankle OA compared to players without ankle OA

|                                                  | PROMIS mental health<br>(median; IQR; min-max) | p-value   | PROMIS physical health<br>(median; IQR; min-max) | p-value   |
|--------------------------------------------------|------------------------------------------------|-----------|--------------------------------------------------|-----------|
| <i>Total</i>                                     |                                                |           |                                                  |           |
| <i>Voluntarily retired*</i><br>(n = 369)         | 53; 48-56; 31-68*                              | p < 0.001 | 54; 48-58; 30-68*                                | p < 0.001 |
| <i>Forced to retire*</i><br>(n = 168)            | 48; 44-53; 28-68*                              |           | 48; 42-51; 27-68*                                |           |
| <i>Voluntarily retired with OA*</i> (n = 30)     | 51; 46-53; 36-63                               | p = 0.074 | 51; 45-54; 35-62*                                | p = 0.001 |
| <i>Voluntarily retired without OA*</i> (n = 339) | 53; 48-59; 31-68                               |           | 54; 48-58; 30-68*                                |           |
| <i>Forced to retire with OA</i> (n = 14)         | 48; 46-55; 31-63                               | p = 0.841 | 42; 40-46; 37-58                                 | p = 0.159 |

### 231 Post-hoc analysis

232 In the literature, forced retirement is a risk factor for post-career mental health symptoms.<sup>25</sup> Following  
 233 data analysis, we were concerned by the seemingly high percentage of football and rugby players who  
 234 stopped due to a career ending injury. As we were analysing the impact ankle OA had on QoL, we felt  
 235 the effect of a career ending injury on QoL to be in line with our initial objectives. Consequently we  
 236 performed a post-hoc analysis to determine any associations between reported forced retirement and  
 237 mental and physical PROMIS health scores. In this study, 31% of players reported to have been forced to  
 238 retire, specifically: 29% of football players and 36% of rugby players.

240 The post-hoc sub-analysis of all players regarding mental and physical health scores associated with  
 241 voluntary retirement and in conjunction with ankle OA is presented in Table 5. No post-hoc sub-analysis  
 242 was done for football and rugby players separately, regarding voluntary retirement in conjunction with  
 243 ankle OA, due to the low number of ankle OA cases among rugby players. However mental and physical  
 244 health scores in football and rugby due to forced retirement is presented separately in Table 5.

245

|                                 |                                              |                   |           |                   |           |
|---------------------------------|----------------------------------------------|-------------------|-----------|-------------------|-----------|
| 1<br>2<br>3<br>4<br>5<br>6<br>7 | <i>Forced to retire without OA (n = 154)</i> | 48; 44-53; 28-68  |           | 48; 42-52; 27-68  |           |
| 8                               | <i>Football*</i>                             |                   |           |                   |           |
| 9                               | <i>Voluntarily retired* (n = 272)</i>        | 53; 48-56; 31-68* |           | 54; 48-58; 30-68* |           |
| 10                              | <i>Forced to retire* (n = 113)</i>           | 48; 44-53; 31-63* | p < 0.001 | 48; 42-51; 27-62* | p < 0.001 |
| 11                              | <i>Rugby*</i>                                |                   |           |                   |           |
| 12                              | <i>Voluntarily retired* (n = 97)</i>         | 53; 48-56; 31-68* |           | 54; 48-58; 35-68* |           |
| 13                              | <i>Forced to retire* (n = 55)</i>            | 48; 44-56; 28-68* | p = 0.018 | 48; 37-54; 30-68* | p < 0.001 |

\*Statistically significant difference; Abbreviations: IQR = Interquartile range; OA = Osteoarthritis; n = number

246

## 248 **Discussion**

249 Our most important findings were that (i) the prevalence of ankle OA among former professional  
250 football and rugby players was, 9.2% (95%CI 6.4 –12.1) and 4.6% (95%CI (1.2 – 8.0), respectively; (ii)  
251 previous severe ankle injuries and ankle surgeries are associated with ankle OA among former  
252 professional football players; and (iii) ankle OA does not lead to reduced mental or physical QoL in  
253 former professional football and rugby players.

254

### 255 **Ankle OA in football and rugby compared to other sports and the general population**

256 Several studies have reported symptomatic ankle OA prevalence among a variety of former elite  
257 athletes, ranging from 0% in volleyball (n = 22), long distance running (n = 30), elite high-jump (n = 30)  
258 and ballet (n = 27) to 10% among former military parachutists (n = 40).<sup>26–30</sup> In our study, the prevalence  
259 of ankle OA among former professional football (9.2%) and rugby players (4.6%) was higher than the  
260 estimated prevalence among the general population (3.4 %).<sup>12</sup> Murray et al. (2018) invited participants  
261 with self-reported ankle pain (11.7%) from the general population for a radiograph (radiological atlas of  
262 Foot OA).<sup>12,31</sup>

263

264 Our study reports a lower ankle OA prevalence compared to previous studies among former  
265 professional football players (12-19%).<sup>13–15</sup> In these studies, data was similarly collected using cross-  
266 sectional retrospective self-reported questionnaires.<sup>13,14</sup> No previous data is available concerning ankle  
267 OA among former professional rugby players. The low ankle OA prevalence among rugby players in this  
268 study is likely due to either an under reporting of ankle OA among rugby players or a type II error.

269

### 270 ***Association of severe ankle injuries and ankle surgeries with ankle OA***

271 In our study, football players were 1.3 (95%CI: 1.1 - 1.6) and 2.1 (95%CI: 1.4 – 3.1) times more likely to  
272 develop ankle OA for every ankle injury and ankle surgery, respectively. This is in line with previous

1  
2  
3 273 studies that showed an association between ankle OA and ankle injuries, stating traumatic ankle injuries  
4  
5 274 to be the main cause of ankle OA (70-78%).<sup>6,7</sup> Consequences of ankle injuries are thought to be due to  
6  
7 275 either direct damage the articular surfaces or change in ankle joint biomechanics (e.g. through chronic  
8  
9 276 ankle instability due to ankle ligament damage).<sup>32</sup> No association was seen for severe ankle injuries or  
10  
11 277 ankle surgeries and ankle OA among rugby players. Although the best estimate for the association of  
12  
13 278 ankle surgeries and OA is similar to football (OR = 2), the 95%CI includes 1 (0.8 – 4.7). This may be due  
14  
15 279 to insufficient power among rugby players, as only 7 reported ankle OA.  
16  
17  
18  
19  
20

### 21 281 ***Health-related quality of life***

22  
23 282 Filbay et al. (2019) reported factors such as age, type of sport (contact/collision sports), OA and  
24  
25 283 involuntary retirement from sport to possibly negatively impact QoL.<sup>25,33–35</sup> However the positive  
26  
27 284 impacts associated with elite sport participation, such as pride of accomplishments, social network  
28  
29 285 (through sport participation) and coping and adjustment to musculoskeletal pain (due to resilience and  
30  
31 286 determination), may persist and even compensate reduced physical QOL beyond retirement of the  
32  
33 287 player's athletic career.<sup>33</sup>  
34  
35  
36  
37  
38

39 289 Our post-hoc sub-analysis revealed 29% of football players and 36% of rugby players were forced to  
40  
41 290 retire. Although we reported several instances of statistically significant differences in our study for both  
42  
43 291 physical and mental PROMIS health scores, all were similar to the estimated norm for the general  
44  
45 292 population (50 points). Unfortunately, there is no robust minimally clinically important difference  
46  
47 293 (MCID) threshold for the PROMIS-10 global short form applicable for this population. Consequently, it is  
48  
49 294 difficult to interpret the results. Nevertheless, although statistically significant, the PROMIS mental and  
50  
51 295 physical health scores observed, for both football and rugby players, are unlikely clinically significant.  
52  
53  
54  
55  
56  
57  
58  
59  
60

1  
2  
3 296 Based on our data, ankle OA does not lead to reduced mental or physical QoL in former professional  
4  
5 297 football and rugby players.  
6

7  
8 298

9  
10 299 ***Strengths and limitations***

11  
12 300 We had an overall good response rate (56%) and a large group of participating football players (401).

13  
14 301 However, several limitations should be mentioned. Firstly, this study had a cross-sectional design,

15  
16 302 therefore no causal-association can be determined. Secondly, there were only 7 rugby players with OA,

17  
18 303 implying a potential serious type II error. Thirdly, recruitment procedures were blinded to the research

19  
20 304 team, a non-response analysis could not be performed. Fourthly, research based (retrospective)

21  
22 305 questionnaires are dependent on the accuracy and understanding of the participant. Professional

23  
24 306 athletes might generally remember the number of severe ankle injuries or surgeries resulting in a

25  
26 307 training or match absence of  $\geq 4$  weeks. However, we cannot exclude that participants were not able to

27  
28 308 precisely recall all their sustained severe ankle injuries and ankle surgeries or that they did not consult

29  
30 309 their last (team) doctor. Finally, our OA definition did not include a clinical and radiological evaluation.

31  
32 310

33  
34  
35  
36 311 ***Implications for practice***

37  
38 312 The epidemiological data from this study regarding ankle OA prevalence among former professional

39  
40 313 football and rugby players, and its association with both severe ankle injuries and ankle surgeries, is an

41  
42 314 essential part of protecting the athlete's health. In both professional football and rugby, a higher

43  
44 315 prevalence of ankle OA can be expected compared to the general population. Furthermore, As the

45  
46 316 majority are post-traumatic, preventive measures and adequate rehabilitation are recommended.

47  
48 317 Awareness should be raised, regarding the increased risk of developing ankle OA following each ankle

49  
50 318 injury and surgery. Additionally primary and secondary prevention programmes should be implemented.

51  
52 319 Exercise based prevention intervention programs, such as the FIFA11+ in football and the movement

1  
2  
3 320 control injury prevention programme in rugby, have found reduced ankle injury incidence and  
4  
5 321 burden.<sup>36,37</sup> Finally, management of ankle OA is key for retired players, focusing on healthy lifestyle  
6  
7 322 including physical activity, pain alleviation, function and minimising disability.<sup>38-40</sup> With this intention,  
8  
9  
10 323 FIFPRO has developed an “After Career Consultation”.<sup>41</sup> Future studies will evaluate its relevance.  
11

12 324

13  
14 325

#### **New findings and impact on clinical practice in the future**

- The prevalence of ankle OA in both professional football (9.2%) and rugby (4.6%), is higher than the estimated prevalence in the general population (3.4%).
- Awareness should be raised among football and rugby players, regarding the increased risk of developing ankle OA following each ankle injury and ankle surgery.
- Primary and secondary prevention programmes should be implemented, as these might help in reducing the risk of developing ankle OA.
- Management of ankle OA is key for retired players. With this intention, FIFPRO has developed an “After Career Consultation”. Future studies will evaluate its relevance.

15  
16  
17  
18  
19  
20  
21  
22  
23  
24  
25  
26  
27  
28  
29  
30  
31  
32  
33  
34  
35  
36  
37  
38  
39  
40 326

41 327

#### **Conclusion**

42  
43  
44 328  
45  
46 329 This cross-sectional study found an athlete reported ankle OA prevalence of 9.2% and 4.6% among  
47  
48 330 recently retired professional football and rugby players, respectively. Severe ankle injuries and ankle  
49  
50 331 surgeries were associated with a higher prevalence of ankle OA in former professional football players.  
51  
52 332 No clinically relevant differences in QoL were reported in players with OA compared to players without  
53  
54  
55 333 OA. As a higher prevalence of ankle OA can be expected in both professional football and rugby  
56  
57  
58  
59  
60



1  
2  
3 334 compared to the general population, and the majority are post-traumatic, primary and secondary  
4  
5 335 preventive measures for ankle injuries and an optimal diagnosis and treatment plan are recommended.  
6  
7  
8 336

9  
10 337 **Acknowledgements**

11  
12 338 The Authors would like to thank all football and rugby players' associations involved. The authors are  
13  
14 339 grateful to all retired professional football and rugby players who participated in the study.  
15  
16  
17 340

18  
19 341 **Contributorship statement**

20  
21 342 Authorship was determined according to the ICMJE authorship recommendations. All authors were  
22  
23 343 involved in the design of the study, data analysis and data interpretation. VG and GMMJK were  
24  
25 344 responsible for data collection. LP drafted the manuscript, with critical review provided by all authors.  
26  
27  
28 345 All authors approved the final version of the manuscript.  
29  
30  
31 346

32 347 **Funding**

33  
34 348 This research received specific grant from any funding agency in the public, commercial or non-profit  
35  
36 349 sectors.  
37  
38  
39 350

40  
41 351 **Competing interests**

42  
43 352 None declared.  
44  
45  
46 353

47  
48 354 **Ethics approval**

49  
50 355 Ethical approval for the study was provided by the Ethical Committee of the Yokohama City Sports  
51  
52 356 Medical Center (17.003; Yokohama, Japan) and the Medical Ethics Review Committee of the Academic  
53  
54 357 Medical Center (W16\_366#16.431; Amsterdam, The Netherlands)  
55  
56  
57  
58  
59  
60

1  
2  
3 358  
4

5 359 **Patient and public involvement**  
6

7 360 This research was done without patient involvement. Patients were not invited to comment on the  
8

9  
10 361 study design and were not consulted to develop patient relevant outcomes or interpret the results.  
11

12 362 Patients were not invited to contribute to the writing or editing of this document for readability or  
13

14 363 accuracy.  
15

16 364  
17

18 365  
19

20  
21 366 **Data sharing statement**  
22

23 367 No additional data available  
24

25 368  
26

27  
28 369  
29  
30  
31  
32  
33  
34  
35  
36  
37  
38  
39  
40  
41  
42  
43  
44  
45  
46  
47  
48  
49  
50  
51  
52  
53  
54  
55  
56  
57  
58  
59  
60

370 **References**

- 371 1. Sankey RA, Brooks JHM, Kemp SPT, Haddad FS. The epidemiology of ankle injuries in professional  
372 rugby union players. *Am J Sports Med.* 2008. doi:10.1177/0363546508322889
- 373 2. Waldén M, Häggglund M, Ekstrand J. Time-trends and circumstances surrounding ankle injuries in  
374 men's professional football: An 11-year follow-up of the UEFA Champions League injury study. *Br*  
375 *J Sports Med.* 2013. doi:10.1136/bjsports-2013-092223
- 376 3. Fuller CW, Taylor A, Kemp SPT, Raftery M. Rugby World Cup 2015: World Rugby injury  
377 surveillance study. *Br J Sports Med.* 2017;51(1):51-57. doi:10.1136/bjsports-2016-096275
- 378 4. Ekstrand J, Krutsch W, Spreco A, et al. Time before return to play for the most common injuries in  
379 professional football: a 16-year follow-up of the UEFA Elite Club Injury Study. *Br J Sports Med.*  
380 2019:bjsports-2019-100666. doi:10.1136/bjsports-2019-100666
- 381 5. Williams S, Trewartha G, Kemp S, Stokes K. A meta-analysis of injuries in senior men's  
382 professional Rugby Union. *Sport Med.* 2013. doi:10.1007/s40279-013-0078-1
- 383 6. Valderrabano V, Horisberger M, Russell I, Dougall H, Hintermann B. Etiology of ankle  
384 osteoarthritis. *Clin Orthop Relat Res.* 2009. doi:10.1007/s11999-008-0543-6
- 385 7. Saltzman CL, Salamon ML, Blanchard GM, et al. Epidemiology of ankle arthritis: report of a  
386 consecutive series of 639 patients from a tertiary orthopaedic center. *Iowa Orthop J.* 2005.
- 387 8. Drawer S, Fuller CW. Evaluating the level of injury in English professional football using a risk  
388 based assessment process. *Br J Sports Med.* 2002. doi:10.1136/bjism.36.6.446
- 389 9. Bathgate A, Best JP, Craig G, Jamieson M. A prospective study of injuries to elite Australian rugby  
390 union players. *Br J Sports Med.* 2002. doi:10.1136/bjism.36.4.265
- 391 10. Garraway WM, Lee AJ, Hutton SJ, Russell EBAW, Macleod DAD. Impact of professionalism on  
392 injuries in rugby union. *Br J Sports Med.* 2000. doi:10.1136/bjism.34.5.348
- 393 11. Brooks JHM, Fuller CW, Kemp SPT, Reddin DB. Epidemiology of injuries in English professional

- 1  
2  
3 394 rugby union: Part 1 match injuries. *Br J Sports Med*. 2005. doi:10.1136/bjism.2005.018135  
4  
5 395 12. Murray C, Marshall M, Rathod T, Bowen CJ, Menz HB, Roddy E. Population prevalence and  
6  
7 396 distribution of ankle pain and symptomatic radiographic ankle osteoarthritis in community  
8  
9  
10 397 dwelling older adults: A systematic review and cross-sectional study. *PLoS One*. 2018.  
11  
12 398 doi:10.1371/journal.pone.0193662  
13  
14 399 13. Drawer S, Fuller CW. Propensity for osteoarthritis and lower limb joint pain in retired professional  
15  
16 400 soccer players. *Br J Sports Med*. 2001. doi:10.1136/bjism.35.6.402  
17  
18 401 14. Turner AP, Barlow JH, Heathcote-Elliot C. Long term health impact of playing professional football  
19  
20 402 in the United Kingdom. *Br J Sports Med*. 2000. doi:10.1136/bjism.34.5.332  
21  
22 403 15. Kuijt MTK, Inklaar H, Gouttebauge V, Frings-Dresen MHW. Knee and ankle osteoarthritis in former  
23  
24 404 elite soccer players: A systematic review of the recent literature. *J Sci Med Sport*. 2012.  
25  
26 405 doi:10.1016/j.jsams.2012.02.008  
27  
28 406 16. Davies MAM, Judge DA, Delmestri A, et al. Health amongst former rugby union players: A cross-  
29  
30 407 sectional study of morbidity and health-related quality of life. *Sci Rep*. 2017. doi:10.1038/s41598-  
31  
32 408 017-12130-y  
33  
34 409 17. Schuring N, Aoki H, Gray J, Kerkhoffs GMMJ, Lambert M, Gouttebauge V. Osteoarthritis is  
35  
36 410 associated with symptoms of common mental disorders among former elite athletes. *Knee*  
37  
38 411 *Surgery, Sport Traumatol Arthrosc*. 2017. doi:10.1007/s00167-016-4255-2  
39  
40 412 18. Gouttebauge V, Inklaar H, Frings-Dresen MHW. Risk and consequences of osteoarthritis after a  
41  
42 413 professional football career: A systematic review of the recent literature. *J Sports Med Phys*  
43  
44 414 *Fitness*. 2014.  
45  
46 415 19. Vandembroucke JP, von Elm E, Altman DG, et al. Strengthening the Reporting of Observational  
47  
48 416 Studies in Epidemiology (STROBE): Explanation and elaboration. *Int J Surg*. 2014.  
49  
50 417 doi:10.1016/j.ijsu.2014.07.014  
51  
52  
53  
54  
55  
56  
57  
58  
59  
60

- 1  
2  
3 418 20. Woodward M. *Epidemiology: Study Design and Data Analysis, Third Edition.*; 2013.  
4  
5 419 21. National Institute for Health and Care Excellence. National Clinical Guideline Centre Osteoarthritis  
6  
7 420 Care and management in adults. 2014;(February):1-505.  
8  
9  
10 421 22. Hays RD, Bjorner JB, Revicki DA, Spritzer KL, Cella D. Development of physical and mental health  
11  
12 422 summary scores from the patient-reported outcomes measurement information system  
13  
14 423 (PROMIS) global items. *Qual Life Res.* 2009. doi:10.1007/s11136-009-9496-9  
15  
16 424 23. Felson DT. An update on the pathogenesis and epidemiology of osteoarthritis. *Radiol Clin North*  
17  
18 425 *Am.* 2004. doi:10.1016/S0033-8389(03)00161-1  
19  
20  
21 426 24. DJ H, JJ M, FJ K. The symptoms of osteoarthritis and the genesis of pain. *Med Clin North Am.*  
22  
23 427 2009. doi:10.1016/j.mcna.2008.08.008  
24  
25 428 25. Gouttebauge V, Castaldelli-Maia JM, Gorczynski P, et al. Occurrence of mental health symptoms  
26  
27 429 and disorders in current and former elite athletes: A systematic review and meta-analysis. *Br J*  
28  
29 430 *Sports Med.* 2019. doi:10.1136/bjsports-2019-100671  
30  
31  
32 431 26. Gross P, Marti B. Risk of degenerative ankle joint disease in volleyball players: Study of former  
33  
34 432 elite athletes. *Int J Sports Med.* 1999. doi:10.1055/s-2007-971094  
35  
36  
37 433 27. Konradsen L, Berg Hansen EM, Søndergaard L. Long distance running and osteoarthrosis. *Am J*  
38  
39 434 *Sports Med.* 1990. doi:10.1177/036354659001800408  
40  
41 435 28. Schmitt H, Lemke JM, Brocai DRC, Parsch D. Degenerative changes in the ankle in former elite  
42  
43 436 high jumpers. *Clin J Sport Med.* 2003. doi:10.1097/00042752-200301000-00002  
44  
45  
46 437 29. Niek Van Dijk C, Lim LSL, Poortman A, Strübbe EH, Marti RK. Degenerative Joint Disease in Female  
47  
48 438 Ballet Dancers. *Am J Sports Med.* 1995. doi:10.1177/036354659502300307  
49  
50 439 30. Murray Leslie CF, Lintott DJ, Wright V. The knees and ankles in sport and veteran military  
51  
52 440 parachutists. *Ann Rheum Dis.* 1977. doi:10.1136/ard.36.4.327  
53  
54  
55 441 31. Menz HB, Munteanu SE, Landorf KB, Zammit G V., Cicuttini FM. Radiographic classification of  
56  
57  
58  
59  
60

- 1  
2  
3 442 osteoarthritis in commonly affected joints of the foot. *Osteoarthr Cartil.* 2007.  
4  
5 443 doi:10.1016/j.joca.2007.05.007  
6  
7 444 32. Wikstrom EA, Hubbard-Turner T, McKeon PO. Understanding and Treating Lateral Ankle Sprains  
8  
9 and their Consequences: A Constraints-Based Approach. *Sport Med.* 2013. doi:10.1007/s40279-  
10 445 013-0043-z  
11  
12 446  
13  
14 447 33. Filbay S, Pandya T, Thomas B, McKay C, Adams J, Arden N. Quality of Life and Life Satisfaction in  
15  
16 Former Athletes: A Systematic Review and Meta-Analysis. *Sport Med.* 2019;(0123456789).  
17 448  
18 doi:10.1007/s40279-019-01163-0  
19 449  
20  
21 450 34. Arnold R, Fletcher D. A Research Synthesis and Taxonomic Classification of the Organizational  
22  
23 451 Stressors Encountered by Sport Performers. *J Sport Exerc Psychol.* 2016.  
24  
25 452 doi:10.1123/jsep.34.3.397  
26  
27 453 35. Wylleman P, Reints A. A lifespan perspective on the career of talented and elite athletes:  
28  
29 Perspectives on high-intensity sports. *Scand J Med Sci Sport.* 2010. doi:10.1111/j.1600-  
30 454 0838.2010.01194.x  
31  
32 455  
33  
34 456 36. Nouni-Garcia R, Carratala-Munuera C, Orozco-Beltran D, Lopez-Pineda A, Asensio-Garcia MR, Gil-  
35  
36 Guillen VF. Clinical benefit of the FIFA 11 programme for the prevention of hamstring and lateral  
37 457 ankle ligament injuries among amateur soccer players. *Inj Prev.* 2018. doi:10.1136/injuryprev-  
38  
39 458 2016-042267  
40  
41 459  
42  
43 460 37. Attwood MJ, Roberts SP, Trewartha G, England ME, Stokes KA. Efficacy of a movement control  
44  
45 461 injury prevention programme in adult men's community rugby union: a cluster randomised  
46  
47 controlled trial. *Br J Sports Med.* 2018. doi:10.1136/bjsports-2017-098005  
48 462  
49  
50 463 38. Kirkendall DT, Garrett WE. Management of the Retired Athlete with Osteoarthritis of the Knee.  
51  
52 464 *Cartilage.* 2012. doi:10.1177/1947603511408287  
53  
54 465 39. McAlindon TE, Bannuru RR, Sullivan MC, et al. OARSI guidelines for the non-surgical management  
55  
56  
57  
58  
59  
60

- 1  
2  
3 466 of knee osteoarthritis. *Osteoarthr Cartil.* 2014. doi:10.1016/j.joca.2014.01.003  
4  
5 467 40. Paterson KL, Gates L. Clinical Assessment and Management of Foot and Ankle Osteoarthritis: A  
6  
7 468 Review of Current Evidence and Focus on Pharmacological Treatment. *Drugs and Aging.* 2019.  
8  
9  
10 469 doi:10.1007/s40266-019-00639-y  
11  
12 470 41. Gouttebarga V, Goedhart E, Kerkhoffs G. Empowering the health of retired professional  
13  
14 471 footballers: The systematic development of an after Career Consultation and its feasibility. *BMJ*  
15  
16 472 *Open Sport Exerc Med.* 2018. doi:10.1136/bmjsem-2018-000466  
17  
18  
19 473  
20  
21 474  
22  
23  
24  
25  
26  
27  
28  
29  
30  
31  
32  
33  
34  
35  
36  
37  
38  
39  
40  
41  
42  
43  
44  
45  
46  
47  
48  
49  
50  
51  
52  
53  
54  
55  
56  
57  
58  
59  
60

STROBE Statement—Checklist of items that should be included in reports of *cross-sectional studies*

|                              | Item No | Recommendation                                                                                                                                                                                                                                                                                                                                                                  |
|------------------------------|---------|---------------------------------------------------------------------------------------------------------------------------------------------------------------------------------------------------------------------------------------------------------------------------------------------------------------------------------------------------------------------------------|
| <b>Title and abstract</b>    | 1       | (a) Indicate the study's design with a commonly used term in the title or the abstract – ✓<br>(b) Provide in the abstract an informative and balanced summary of what was done and what was found – ✓                                                                                                                                                                           |
| <b>Introduction</b>          |         |                                                                                                                                                                                                                                                                                                                                                                                 |
| Background/rationale         | 2       | Explain the scientific background and rationale for the investigation being reported – ✓: p. 4 line 64 – 96                                                                                                                                                                                                                                                                     |
| Objectives                   | 3       | State specific objectives, including any prespecified hypotheses – ✓: p. 4 line 98 – 104                                                                                                                                                                                                                                                                                        |
| <b>Methods</b>               |         |                                                                                                                                                                                                                                                                                                                                                                                 |
| Study design                 | 4       | Present key elements of study design early in the paper – ✓: p. 6 line 108 – 114                                                                                                                                                                                                                                                                                                |
| Setting                      | 5       | Describe the setting, locations, and relevant dates, including periods of recruitment, exposure, follow-up, and data collection – ✓: p. 6 line 116 – 133                                                                                                                                                                                                                        |
| Participants                 | 6       | (a) Give the eligibility criteria, and the sources and methods of selection of participants – ✓: p. 6 line 116 – 133                                                                                                                                                                                                                                                            |
| Variables                    | 7       | Clearly define all outcomes, exposures, predictors, potential confounders, and effect modifiers. Give diagnostic criteria, if applicable – ✓: p. 6 line 135 – 159                                                                                                                                                                                                               |
| Data sources/<br>measurement | 8*      | For each variable of interest, give sources of data and details of methods of assessment (measurement). Describe comparability of assessment methods if there is more than one group – ✓: p. 6 line 161 – 172                                                                                                                                                                   |
| Bias                         | 9       | Describe any efforts to address potential sources of bias – ✓: p. 6 line 117                                                                                                                                                                                                                                                                                                    |
| Study size                   | 10      | Explain how the study size was arrived at – ✓: p. 6 – 7 line 130 – 133                                                                                                                                                                                                                                                                                                          |
| Quantitative variables       | 11      | Explain how quantitative variables were handled in the analyses. If applicable, describe which groupings were chosen and why – ✓: p. 8-9 line 175 – 188                                                                                                                                                                                                                         |
| Statistical methods          | 12      | (a) Describe all statistical methods, including those used to control for confounding<br>(b) Describe any methods used to examine subgroups and interactions<br>(c) Explain how missing data were addressed<br>(d) If applicable, describe analytical methods taking account of sampling strategy<br>(e) Describe any sensitivity analyses<br>– ✓: <b>p. 8-9 line 175 – 188</b> |
| <b>Results</b>               |         |                                                                                                                                                                                                                                                                                                                                                                                 |
| Participants                 | 13*     | (a) Report numbers of individuals at each stage of study—eg numbers potentially eligible, examined for eligibility, confirmed eligible, included in the study, completing follow-up, and analysed – ✓: <b>p. 10 line 192 – 196</b><br>(b) Give reasons for non-participation at each stage – ✓: <b>p. 10 line 192 – 196</b><br>(c) Consider use of a flow diagram               |
| Descriptive data             | 14*     | (a) Give characteristics of study participants (eg demographic, clinical, social) and information on exposures and potential confounders – ✓: <b>p 11 table 1</b><br>(b) Indicate number of participants with missing data for each variable of interest                                                                                                                        |
| Outcome data                 | 15*     | Report numbers of outcome events or summary measures – ✓: <b>p 11 – 14, table 2 -4</b>                                                                                                                                                                                                                                                                                          |
| Main results                 | 16      | (a) Give unadjusted estimates and, if applicable, confounder-adjusted estimates and their precision (eg, 95% confidence interval). Make clear which confounders were adjusted for and why they were included – ✓: <b>p 11 – 14, table 2 -4</b><br>(b) Report category boundaries when continuous variables were categorized                                                     |



1  
2  
3  
4  
5  
6  
7  
8  
9  
10  
11  
12  
13  
14  
15  
16  
17  
18  
19  
20  
21  
22  
23  
24  
25  
26  
27  
28  
29  
30  
31  
32  
33  
34  
35  
36  
37  
38  
39  
40  
41  
42  
43  
44  
45  
46  
47  
48  
49  
50  
51  
52  
53  
54  
55  
56  
57  
58  
59  
60

(c) If relevant, consider translating estimates of relative risk into absolute risk for a meaningful time period

|                          |    |                                                                                                                                                                                                                  |
|--------------------------|----|------------------------------------------------------------------------------------------------------------------------------------------------------------------------------------------------------------------|
| Other analyses           | 17 | Report other analyses done—eg analyses of subgroups and interactions, and sensitivity analyses – √: <b>p 15, line 227 – 237 + p 16 table 5</b>                                                                   |
| <b>Discussion</b>        |    |                                                                                                                                                                                                                  |
| Key results              | 18 | Summarise key results with reference to study objectives – √: <b>p 17, line 242 - 245</b>                                                                                                                        |
| Limitations              | 19 | Discuss limitations of the study, taking into account sources of potential bias or imprecision. Discuss both direction and magnitude of any potential bias – √: <b>p 3, line 53 - 62</b>                         |
| Interpretation           | 20 | Give a cautious overall interpretation of results considering objectives, limitations, multiplicity of analyses, results from similar studies, and other relevant evidence – √: <b>p 19 - 20, line 293 - 317</b> |
| Generalisability         | 21 | Discuss the generalisability (external validity) of the study results <b>p 19 - 20, line 293 - 305</b>                                                                                                           |
| <b>Other information</b> |    |                                                                                                                                                                                                                  |
| Funding                  | 22 | Give the source of funding and the role of the funders for the present study and, if applicable, for the original study on which the present article is based <b>p 21, line 339 - 340</b>                        |

\*Give information separately for exposed and unexposed groups.

**Note:** An Explanation and Elaboration article discusses each checklist item and gives methodological background and published examples of transparent reporting. The STROBE checklist is best used in conjunction with this article (freely available on the Web sites of PLoS Medicine at <http://www.plosmedicine.org/>, Annals of Internal Medicine at <http://www.annals.org/>, and Epidemiology at <http://www.epidem.com/>). Information on the STROBE Initiative is available at [www.strobe-statement.org](http://www.strobe-statement.org).

# BMJ Open

## Ankle osteoarthritis and its association with severe ankle injuries, ankle surgeries and health-related quality of life in recently retired professional male football and rugby players: A Cross-sectional observational study

|                                 |                                                                                                                                                                                                                                                                                                                                                                                                                                                                                                                                                                                                                                                                                                                                                                                                                                                                                                                                                                                                                                                                                                                                                                                                                                                                                                                                          |
|---------------------------------|------------------------------------------------------------------------------------------------------------------------------------------------------------------------------------------------------------------------------------------------------------------------------------------------------------------------------------------------------------------------------------------------------------------------------------------------------------------------------------------------------------------------------------------------------------------------------------------------------------------------------------------------------------------------------------------------------------------------------------------------------------------------------------------------------------------------------------------------------------------------------------------------------------------------------------------------------------------------------------------------------------------------------------------------------------------------------------------------------------------------------------------------------------------------------------------------------------------------------------------------------------------------------------------------------------------------------------------|
| Journal:                        | <i>BMJ Open</i>                                                                                                                                                                                                                                                                                                                                                                                                                                                                                                                                                                                                                                                                                                                                                                                                                                                                                                                                                                                                                                                                                                                                                                                                                                                                                                                          |
| Manuscript ID                   | bmjopen-2020-036775.R1                                                                                                                                                                                                                                                                                                                                                                                                                                                                                                                                                                                                                                                                                                                                                                                                                                                                                                                                                                                                                                                                                                                                                                                                                                                                                                                   |
| Article Type:                   | Original research                                                                                                                                                                                                                                                                                                                                                                                                                                                                                                                                                                                                                                                                                                                                                                                                                                                                                                                                                                                                                                                                                                                                                                                                                                                                                                                        |
| Date Submitted by the Author:   | 26-Mar-2020                                                                                                                                                                                                                                                                                                                                                                                                                                                                                                                                                                                                                                                                                                                                                                                                                                                                                                                                                                                                                                                                                                                                                                                                                                                                                                                              |
| Complete List of Authors:       | <p>Paget, Liam; Amsterdam UMC - Locatie AMC, Orthopaedic surgery; Amsterdam Collaboration for Health and Safety in Sports, AMC/VUMC IOC Research Center (ACHSS)</p> <p>Aoki, Haruhito; St. Marianna University School of Medicine; Yokohama City Sports Medical Center</p> <p>Kemp, Simon; Rugby Football Union, Sports Medicine</p> <p>Lambert, Mike; University of Cape Town, UCT/MRC Research Unit for Exercise Science and Sports Medicine</p> <p>Readhead, Clint; South Africa Rugby Union, Medical; University of Cape Town Division of Exercise Science and Sports Medicine</p> <p>Stokes, Keith; University of Bath, Department for Health; Rugby Football Union,</p> <p>Viljoen, Wayne; South African Rugby Union, Medical; University of Cape Town Division of Exercise Science and Sports Medicine</p> <p>Reurink, G; Sports Medicine, OLVG, The Sport Physician Group; Academic Center for Evidence-based Sports medicine (ACES)</p> <p>Tol, J; Academic Center for Evidence-Based Sports medicine (ACES); Aspetar Orthopaedic and Sports Medicine Hospital</p> <p>Kerkhoffs, Gino; Amsterdam UMC - Locatie AMC, Orthopaedic surgery; Amsterdam Collaboration for Health and Safety in Sports (ACHSS)</p> <p>Gouttebauge, Vincent; Amsterdam UMC - Locatie AMC, Orthopaedic surgery; Football Players Worldwide (FIFPRO)</p> |
| <b>Primary Subject Heading</b>: | Sports and exercise medicine                                                                                                                                                                                                                                                                                                                                                                                                                                                                                                                                                                                                                                                                                                                                                                                                                                                                                                                                                                                                                                                                                                                                                                                                                                                                                                             |
| Secondary Subject Heading:      | Rehabilitation medicine, Sports and exercise medicine                                                                                                                                                                                                                                                                                                                                                                                                                                                                                                                                                                                                                                                                                                                                                                                                                                                                                                                                                                                                                                                                                                                                                                                                                                                                                    |
| Keywords:                       | EPIDEMIOLOGY, ORTHOPAEDIC & TRAUMA SURGERY, Foot & ankle < ORTHOPAEDIC & TRAUMA SURGERY, Orthopaedic sports trauma < ORTHOPAEDIC & TRAUMA SURGERY, SPORTS MEDICINE                                                                                                                                                                                                                                                                                                                                                                                                                                                                                                                                                                                                                                                                                                                                                                                                                                                                                                                                                                                                                                                                                                                                                                       |
|                                 |                                                                                                                                                                                                                                                                                                                                                                                                                                                                                                                                                                                                                                                                                                                                                                                                                                                                                                                                                                                                                                                                                                                                                                                                                                                                                                                                          |

1  
2  
3  
4  
5  
6  
7  
8  
9  
10  
11  
12  
13  
14  
15  
16  
17  
18  
19  
20  
21  
22  
23  
24  
25  
26  
27  
28  
29  
30  
31  
32  
33  
34  
35  
36  
37  
38  
39  
40  
41  
42  
43  
44  
45  
46  
47  
48  
49  
50  
51  
52  
53  
54  
55  
56  
57  
58  
59  
60



I, the Submitting Author has the right to grant and does grant on behalf of all authors of the Work (as defined in the below author licence), an exclusive licence and/or a non-exclusive licence for contributions from authors who are: i) UK Crown employees; ii) where BMJ has agreed a CC-BY licence shall apply, and/or iii) in accordance with the terms applicable for US Federal Government officers or employees acting as part of their official duties; on a worldwide, perpetual, irrevocable, royalty-free basis to BMJ Publishing Group Ltd ("BMJ") its licensees and where the relevant Journal is co-owned by BMJ to the co-owners of the Journal, to publish the Work in this journal and any other BMJ products and to exploit all rights, as set out in our [licence](#).

The Submitting Author accepts and understands that any supply made under these terms is made by BMJ to the Submitting Author unless you are acting as an employee on behalf of your employer or a postgraduate student of an affiliated institution which is paying any applicable article publishing charge ("APC") for Open Access articles. Where the Submitting Author wishes to make the Work available on an Open Access basis (and intends to pay the relevant APC), the terms of reuse of such Open Access shall be governed by a Creative Commons licence – details of these licences and which [Creative Commons](#) licence will apply to this Work are set out in our licence referred to above.

Other than as permitted in any relevant BMJ Author's Self Archiving Policies, I confirm this Work has not been accepted for publication elsewhere, is not being considered for publication elsewhere and does not duplicate material already published. I confirm all authors consent to publication of this Work and authorise the granting of this licence.

1  
2  
3 **1 Ankle osteoarthritis and its association with severe ankle injuries, ankle surgeries and health-related**  
4  
5 **2 quality of life in recently retired professional male football and rugby players: A Cross-sectional**  
6  
7 **3 observational study**  
8  
9

10 4 Liam D. A. Paget<sup>1,2,3</sup>, Haruhito Aoki<sup>4,5</sup>, Simon Kemp<sup>6</sup>, Mike Lambert<sup>7</sup>, Clint Readhead<sup>7,8</sup>, Keith Stokes<sup>6,9,10</sup>,  
11  
12 5 Wayne Viljoen<sup>7,8</sup>, Gustaaf Reurink<sup>1,2,3,11</sup>, Johannes L. Tol<sup>2,3,12</sup>, Gino M. M. J. Kerkhoffs<sup>1,2,3</sup>, Vincent  
13  
14 6 Gouttebarga<sup>1,2,3,4,13</sup>  
15

16  
17  
18  
19 8 <sup>1</sup> Amsterdam UMC, University of Amsterdam, Department of Orthopaedic Surgery, Amsterdam Movement  
20  
21 9 Sciences, Meibergdreef 9, Amsterdam, the Netherlands

22  
23 10 <sup>2</sup> Academic Center for Evidence based Sports medicine (ACES), The Netherlands; Amsterdam

24  
25 11 <sup>3</sup> Amsterdam Collaboration on Health & Safety in Sports (ACHSS), AMC/VUmc IOC Research Center of Excellence,  
26  
27 12 Amsterdam, The Netherlands

28  
29 13 <sup>4</sup> St. Marianna University School of Medicine, Kawasaki, Japan

30  
31 14 <sup>5</sup> Yokohama City Sports Medical Center, Yokohama, Japan

32  
33 15 <sup>6</sup> Rugby Football Union, Twickenham, UK

34  
35 16 <sup>7</sup> Division of Exercise Science and Sports Medicine (ESSM), University of Cape Town, Cape Town, South Africa

36  
37 17 <sup>8</sup> South African Rugby Union (SARU), Cape Town, South Africa

38  
39 18 <sup>9</sup> Department for Health, University of Bath, Bath, UK

40  
41 19 <sup>10</sup> Centre for Sport, Exercise and Osteoarthritis Research Versus Arthritis

42  
43 20 <sup>11</sup> The Sport Physician Group, Department of Sports Medicine, OLVG, Amsterdam, The Netherlands

44  
45 21 <sup>12</sup> Aspetar, Orthopaedic and Sports Medicine Hospital, Doha, Qatar

46  
47 22 <sup>13</sup> Football Players Worldwide (FIFPRO), Hoofddorp, The Netherlands

48  
49 23

50  
51 **24 Correspondence**

52  
53 25 Liam. D.A. Paget – [L.d.paget@amsterdamumc.nl](mailto:L.d.paget@amsterdamumc.nl)

54  
55 26 Department of Orthopaedic Surgery, Amsterdam UMC

56  
57 27 PO Box 22660, 1100 DD Amsterdam, The Netherlands

1  
2  
3 **28 Abstract**

4  
5 **29 Objectives**

6  
7  
8 To determine (i) the prevalence of ankle osteoarthritis (OA) among former professional football and  
9  
10 31 rugby players, (ii) assess the association between ankle injuries or ankle surgeries with ankle OA, and (iii)  
11  
12 32 compare the mental and physical quality of life (QoL) between former professional football and rugby  
13  
14 33 players with and without OA.  
15

16  
17 34

18  
19 **35 Methods**

20  
21 36 We conducted a questionnaire based observational study with a cross-sectional design. Former  
22  
23 37 professional football and rugby players were recruited by the football players worldwide (FIFPRO) and  
24  
25 38 the International Rugby Players (IRP). Information concerning ankle OA, sustained ankle injuries and  
26  
27 39 ankle surgeries was gathered (medical record or most recent medical professional). Health related  
28  
29  
30 40 QoL was assessed using the PROMIS physical and mental health scores.  
31

32  
33 41

34  
35 **42 Results**

36  
37 43 Overall, 553 former professional football (n = 401) and rugby players (n = 152) were enrolled in the  
38  
39 44 study (response rate of 56%). Ankle OA prevalence among former professional football and rugby  
40  
41 45 players was 9.2% and 4.6%, respectively. Football players were more likely to suffer from ankle OA  
42  
43 46 following every ankle injury and/or surgery. Football and rugby players with ankle OA had similar  
44  
45  
46 47 PROMIS physical and mental health scores to the norm for the general population.  
47

48  
49 48

50  
51 **49 Conclusion**

52  
53 50 Former professional football and rugby players had a higher ankle OA prevalence than the general  
54  
55 51 population (3.4%). Football players are more likely to suffer from ankle OA following every ankle injury  
56  
57

1  
2  
3 52 and/or surgery. No clinical relevant difference was seen for physical or mental health related QoL among  
4  
5 53 football and rugby players. Preventive measures for ankle injuries are recommended.  
6  
7  
8 54

9  
10 55 ***Strengths and limitations***

- 11  
12 56 - Overall good response rate (56%) and a large group of participating football players (401)  
13  
14  
15 57 - This study had a cross-sectional design, therefore no causal-association can be determined  
16  
17  
18 58 - This study contributes to the literature, where the current available data concerning ankle OA in  
19  
20 59 professional football and rugby players is outdated or non-existent.  
21  
22  
23 60 - The data is based on (retrospective) questionnaires and is therefore dependent on the accuracy  
24  
25 61 and understanding of the participant. Our OA definition did not include a clinical and  
26  
27  
28 62 radiological evaluation.  
29  
30  
31 63

## 64 Background

65 Football and Rugby Union (hereafter 'rugby') are among the most popular team sports worldwide. In  
66 both sports, ankle injuries represent a significant proportion of the total injuries sustained.<sup>1-5</sup> Previous  
67 ankle injuries are an important risk factor for ankle osteoarthritis (OA).<sup>6,7</sup>  
68  
69 Drawer et al. (2002) estimates the overall risk of injury in professional football to be 1,000 times higher  
70 than in high-risk industrial occupations, with ankle injuries contributing 10-18% of all injuries.<sup>2,8</sup> The  
71 Union of European Football Associations (UEFA) Champions League Injury Study reported an overall  
72 ankle injury rate of 1 injury per 1000 hours.<sup>2</sup> Lateral ankle sprains (51%) were the most prevalent sub-  
73 type of ankle injuries.<sup>2</sup> In professional rugby, epidemiological studies show that ankle injuries contribute  
74 5-20% of all injuries.<sup>1,3,9,10</sup> Similar to professional football, lateral ankle sprains are the most common  
75 ankle injuries with an injury rate of 3.8 - 4.5 injuries per 1,000 player hours depending on the position on  
76 the field.<sup>11</sup>

77  
78 Two retrospective cohort studies from the general population (n = 390 and n = 639 patients  
79 respectively), reported that 70-78% of ankle OA cases were associated with a previously sustained ankle  
80 injury. These previous injuries included fractures, isolated osteochondral defects of the talus and ankle  
81 ligament injuries.<sup>6,7</sup> Among these post-traumatic ankle OA cases, 28% were associated with a previously  
82 sustained ligamentous injury.<sup>7</sup> To our knowledge, there are no prospective studies on the association of  
83 ankle injuries and ankle OA.

84  
85 In the general population the prevalence of ankle OA is estimated to be 3.4% in people over 50 years of  
86 age.<sup>12</sup> The reported prevalence of ankle OA 16 to 22 years after a professional football career is 12-  
87 19%.<sup>13-15</sup> No data are available for ankle OA among former professional rugby players. In comparison to



1  
2  
3 88 a general population control group, the prevalence of OA in any joint and the incidence of joint  
4  
5 89 replacement for any joint was estimated to be 4 and 6 times higher, respectively, among former elite  
6  
7 90 rugby players.<sup>16</sup> This has been associated with a significantly poorer mental and physical health-related  
8  
9  
10 91 quality of life (QoL).<sup>16</sup>  
11

12 92  
13  
14 93 Several other studies report the association of general OA with mental health symptoms and physical  
15  
16 94 health-related QoL among former elite athletes across professional team sports including football and  
17  
18 95 rugby.<sup>17,18</sup> Therefore, the impact of OA on retired players must be considered. To date, the  
19  
20  
21 96 epidemiological evidence concerning the prevalence of ankle OA in professional football is either  
22  
23 97 outdated or limited, and in the case of rugby non-existent, while data on the association between  
24  
25 98 previous ankle injury and ankle OA is scarce in both sports.  
26

27 99  
28  
29  
30 100 The objective of this study was threefold. Firstly, to evaluate the prevalence of ankle OA in recently  
31  
32 101 retired professional football and rugby players. Secondly, to determine the association between ankle  
33  
34 102 injury and/or ankle surgery and ankle OA. Thirdly, to compare the mental and physical QoL in players  
35  
36 103 with and without ankle OA. Our hypotheses were that (i) recently retired professional football and rugby  
37  
38 104 players have a higher ankle OA prevalence than the general population (as found in the literature), (ii)  
39  
40 105 ankle injuries and/or ankle surgeries are associated with ankle OA, and (iii) the mental and physical QoL  
41  
42 106 of recently retired professional football and rugby players with OA is lower compared to those players  
43  
44  
45 107 without OA.  
46

47  
48 108  
49  
50  
51  
52  
53  
54  
55  
56  
57  
58  
59  
60

1  
2  
3 110 **Methods**  
4

5 111 **Design**  
6

7 112 We conducted a questionnaire based observational study with a cross-sectional design. Ethical approval  
8 113 for the study was provided by the Ethical Committee of the Yokohama City Sports Medical Center (17.003;  
9  
10 114 Yokohama, Japan) and the Medical Ethics Review Committee of the Academic Medical Center  
11  
12 115 (W16\_366#16.431; Amsterdam, The Netherlands). The study was reported according to the  
13  
14 116 'Strengthening the Reporting of Observational Studies in Epidemiology' statement and conducted in  
15  
16 117 accordance with the Declaration of Helsinki (2013).<sup>19</sup>  
17  
18  
19  
20

21 118

22  
23 119 **Participants**  
24

25 120 Retired professional football and rugby players were randomly recruited to reduce recruitment bias, by  
26  
27 121 the Football Players Worldwide (FIFPRO) and the International Rugby Players (IRP). Inclusion criteria were:  
28  
29 122 (a) being a retired male professional football or rugby player; (b) being younger than 50 years of age; (c)  
30  
31 123 being able to read and comprehend texts in English, French or Spanish.  
32  
33

34 124

35  
36 125 The definition of a retired professional football or rugby player was that he (i) has trained to improve  
37  
38 126 performances, (ii) has competed in the highest or second highest national league, and (iii), has had training  
39  
40 127 and competition as a major activity (way of living) or focus of personal interest, devoting several hours in  
41  
42 128 all or most of the days for these activities, and exceeding the time allocated to other types of professional  
43  
44 129 or leisure activities. If interested, players received information about the study, gave their informed  
45  
46 130 consent and completed an electronic questionnaire. Once completed, the electronic questionnaires were  
47  
48 131 saved automatically on a secured electronic server that only the principal investigator could access.  
49

50  
51  
52 132

53  
54 133 Sample size calculation for ankle OA prevalence indicated that 138 participants per sport were needed  
55  
56  
57  
58  
59  
60

1  
2  
3 134 (power of 80%, confidence interval of 95%; absolute precision of 5%) under the assumption of an  
4  
5 135 anticipated population proportion of 10%.<sup>20</sup> Expecting a response rate of approximately 50%, we intended  
6  
7 136 to reach at least 300 participants per sport.  
8  
9

10 137

11  
12 138 ***Dependent variable: Ankle osteoarthritis***  
13

14 139 The clinical diagnosis of ankle OA by a medical professional was retrospectively determined using a single  
15  
16 140 question ('Have you been diagnosed with ankle osteoarthritis by a medical professional?'). Participants  
17  
18 141 were given the definition of ankle OA (based on the NICE criteria; adapted for age), determined as the  
19  
20 142 damage of the ankle joint's cartilage that leads to activity-related joint pain with either no morning joint-  
21  
22 143 related stiffness or morning stiffness that lasts no longer than 30 minutes.<sup>21</sup> For this question, participants  
23  
24 144 were requested to consult either their medical record or their most recent medical professional.  
25  
26  
27

28 145

29  
30 146 ***Independent variable: Severe ankle injury and related surgery***  
31

32 147 History of a severe ankle injury during their professional football or rugby career was examined through  
33  
34 148 a single question for the sequential recording of single or multiple injury events over time. Similarly,  
35  
36 149 history of an ankle related surgery was recorded through a single question for the sequential recording of  
37  
38 150 a single or multiple ankle surgeries over time. In our study, a severe ankle injury was defined as an injury  
39  
40 151 that involved the ankle joint, occurred during team activities (training or match), and led to absence from  
41  
42 152 either training or a match for more than 28 days<sup>18,19</sup>. For this question, participants were requested to  
43  
44 153 consult either their medical records or their most recent medical professional.  
45  
46  
47

48 154

49  
50 155 ***Health-related quality of life***  
51

52 156 The Patient-Reported Outcomes Measurement Information System Global Health short form (PROMIS-  
53  
54 157 GH) assesses multiple domains related to health-related quality of life such as health, functioning, pain,  
55  
56  
57  
58  
59

1  
2  
3 158 social activities and fatigue.<sup>20</sup> The PROMIS-GH has been validated in several populations and languages  
4  
5 159 among which are English, French and Spanish (for detailed information, see [www.nihpromis.org](http://www.nihpromis.org)).<sup>20</sup> The  
6  
7 160 Global Mental Health and Global Physical Health scores were calculated based on 10 items each measured  
8  
9  
10 161 on a 5-point scale (from 1 to 5) and subsequently converted.<sup>20</sup> These subscale scores ranged from 0 to  
11  
12 162 100, with a higher score indicating better quality of life and a mean score of 50 indicating the norm for  
13  
14 163 the general population.<sup>22</sup>

164

### 165 ***Procedures***

166 An anonymous questionnaire (electronic and/or paper) available in English, French and Spanish was  
167 compiled (LimeSurvey Professional). It included the following descriptive variables: age, body-height,  
168 body-weight, duration of professional football or rugby career, level of play, duration and nature of  
169 retirement, and current employment status (employed or not employed). Additionally, this questionnaire  
170 included questions for the outcomes previously elaborated on (ankle OA, ankle injury, ankle surgery, QoL).  
171 Information about the study was sent per email to potential participants by FIFPRO and IRP. Participants  
172 interested in the study, gave their informed consent and completed the electronic questionnaire.  
173 Participants were asked to complete the questionnaire within 2 weeks, reminders being sent after 2 and  
174 4 weeks. For privacy reasons, the responses to the questionnaires were coded and anonymized. Once  
175 completed, the electronic questionnaires were automatically saved on a secured electronic server that  
176 only the principal investigator could access. Players participated voluntarily and did not receive any  
177 reward for their participation.

178

### 179 ***Statistical analyses***

180 Data analysis was performed using the statistical software IBM SPSS 24.0 for Windows. Analyses were  
181 conducted separately for retired professional football and rugby players. Data were assessed (visually) for

1  
2  
3 182 normality and presented as mean  $\pm$  standard deviation (SD), median (interquartile range [IQR]), or  
4  
5 183 frequency (proportion in %) as appropriate. Body mass index (BMI) was calculated using the provided  
6  
7 184 weight and height of participants (kg/m<sup>2</sup>). Prevalence of ankle OA, overall and within the age categories  
8  
9 185 of  $\leq 40$  years and  $>40$  years, was calculated as the proportion of the number of participants with ankle OA  
10  
11 186 relative to the total number of participants in each category.<sup>20</sup> *We chose to dichotomize age at 40 years,*  
12  
13 187 *as our population included former professional athletes. This is opposed to Murray et al. (2018)*  
14  
15 188 *concerning the general population (dichotomized at 50 years of age), and in line with Song et al. (2019)*  
16  
17 189 *studying former professional American Football players. We made the assumption that although no-*  
18  
19 190 *longer professionals, these former professional athletes would no longer be competing at a decent level*  
20  
21 191 *at the age of 40. We therefore found 40 years to be a more relevant age to dichotomise than 50 years.*<sup>12,23</sup>  
22  
23 192 A logistic regression analysis was performed to determine the association of the number of severe ankle  
24  
25 193 injuries and/or ankle surgeries (continuous independent variable) with ankle OA (dichotomous dependent  
26  
27 194 variable). Severe ankle injuries and or ankle-related surgeries were also expressed using 3 pre-determined  
28  
29 195 categories (0, 1 and  $>1$ ). This was adjusted for age and BMI, both having been identified as risk factors for  
30  
31 196 OA.<sup>24,25</sup> Descriptive analyses of health-related quality of life (Global Physical Health and Global Mental  
32  
33 197 Health) were conducted, while comparisons between groups (retired players with ankle OA vs. retired  
34  
35 198 players without ankle OA) were made using a Mann-Whitney U test for independent samples.<sup>20</sup>  
36  
37  
38  
39  
40  
41  
42

#### 43 200 **Patient and public involvement**

44  
45 201 This research was done without patient involvement. Patients were not invited to comment on the  
46  
47 202 study design and were not consulted to develop patient relevant outcomes or interpret the results.  
48  
49 203 Patients were not invited to contribute to the writing or editing of this document for readability or  
50  
51 204 accuracy.  
52  
53  
54  
55  
56  
57  
58  
59  
60

1  
2  
3 205 **Results**

4  
5 206 ***Participants***

6  
7 207 From a total of 750 football and 326 rugby players contacted, respectively 401 and 152 gave their

8  
9 208 written informed consent and completed the questionnaire (overall response rate of 56%).

10  
11 209 Characteristics of the two groups including the pre-determined sub-categories for severe ankle injuries

12  
13 210 and ankle surgeries (0, 1 and >1) are illustrated in Table 1.

14  
15 211

16  
17 212 ***Prevalence of ankle osteoarthritis, severe injury and surgery***

18  
19 213 The prevalence of patient reported ankle OA (including the pre-determined categories of ≤ 40 years

20  
21 214 and > 40 years) among recently retired professional football and rugby players, is presented in Table 2.

22  
23 215 The prevalence of ankle OA in former professional football players was 9.2% (n = 37). Overall, 94% of

24  
25 216 players with ankle OA were documented to have sustained ≥1 ankle injury and 62% had undergone ≥1

26  
27 217 ankle surgery. In the non-OA group (n = 364), 54% had sustained ≥1 ankle injury and 14% had

28  
29 218 undergone ≥1 ankle surgery. Logistic regression analysis (Table 3) showed that football players who

30  
31 219 had sustained a severe ankle injury were 1.3 (95%CI: 1.1 - 1.6) times more likely to report ankle OA (p <

32  
33 220 0.001). Football players who had undergone ankle surgery were 2.1 (95%CI: 1.4 – 3.1) times more likely

34  
35 221 to report ankle OA (p < 0.001).

36  
37 222

38  
39 223 The prevalence of ankle OA in former professional rugby players was 4.6% (n = 7). Overall, six out of

40  
41 224 seven (86%) rugby players with ankle OA reported to have sustained ≥1 ankle injury and four out of

42  
43 225 seven (57.1%) had undergone ≥1 ankle surgery. In the non-OA group (n = 145), 58.2% had sustained ≥1

44  
45 226 ankle injury and 18.4% had undergone ≥1 ankle surgery. Logistic regression analysis (Table 3) showed no

46  
47 227 significant association between either severe ankle injuries (OR = 1.1 95%CI: 0.8 – 1.5) or ankle surgeries

48  
49 228 (OR = 2.0 95%CI: 0.8 – 4.7) and ankle OA among former professional rugby players.

Table 1: Descriptive characteristics of recently retired professional football players and rugby players

|                                                                     | Football                       |                              |                                | Rugby                          |                                 |                                 |
|---------------------------------------------------------------------|--------------------------------|------------------------------|--------------------------------|--------------------------------|---------------------------------|---------------------------------|
|                                                                     | Total<br>(n = 401)             | Ankle OA<br>(n = 37)         | No ankle OA<br>(n = 364)       | Total<br>(n = 152)             | Ankle OA<br>(n = 7)             | No ankle OA<br>(n = 145)        |
| Age in years *<br>(median; IQR; min-max/<br>mean ± SD)              | 36<br>(32-40; 25-50)           | 39<br>(36-42; 27-49)*        | 36<br>(32-40; 25-50)*          | 40 ± 6                         | 41 ± 7                          | 40 ± 6                          |
| Height in cm<br>(mean ± SD / median; IQR;<br>min-max)               | 181 ± 7                        | 180 ± 7                      | 182 ± 7                        | 186<br>(180-191; 166-203)      | 191<br>(173-192; 172-192)       | 186<br>(180-191; 166-203)       |
| Weight in kg<br>(in kg (mean ± SD))                                 | 82 ± 9                         | 82 ± 13                      | 82 ± 9                         | 100<br>(91-114; 59-170)        | 108<br>(89-123; 82-130)         | 100<br>(91-113; 59-170)         |
| BMI in kg/m <sup>2</sup><br>(median; IQR; min-max))                 | 24.8<br>(23.5-26.2; 20.1-32.7) | 24.8<br>(22.9-26.6; 20.3-29) | 24.7<br>(23.5-26.1; 20.1-32.7) | 29.0<br>(27.1-31.4; 20.4-52.5) | 32.2<br>(28.5-33.7; 27.4-35.3)* | 28.9<br>(27.0-31.2; 20.4-52.5)* |
| Employed in %<br>(n)                                                | 89%<br>(350)                   | 92%<br>(33)                  | 89%<br>(317)                   | 91%<br>(139)                   | 86%<br>(6)                      | 92%<br>(133)                    |
| Professional career duration<br>in years (median; IQR; min-<br>max) | 13<br>(10-15; 2-19)            | 13<br>(12-16; 5-18)          | 13<br>(9-15; 2-19)             | 10<br>(7-15; 2-20)             | 10<br>(8-12.5; 8-13)            | 10<br>(7-15; 2-20)              |
| Retirement duration in years<br>(median; IQR; min-max)              | 4<br>(2-7; 1-17)               | 5<br>(3-9; 1-12)             | 4<br>(2-7; 1-17)               | 8<br>(3-12; 0-22)              | 12<br>(2-16; 1-19)              | 8<br>(4-11; 0-22)               |
| Level of play top league; %<br>(n)                                  | 81%<br>(314)                   | 92%<br>(34)                  | 80%<br>(280)                   | 80%<br>(106)                   | 86%<br>(6)                      | 80%<br>(100)                    |
| Forced retirement %<br>(n)                                          | 29%<br>(113)                   | 27%<br>(10)                  | 30%<br>(103)                   | 36%<br>(55)                    | 57%<br>(4)                      | 35%<br>(51)                     |
| Severe ankle injuries<br>(median; IQR; min-max)                     | 1<br>(0-2; 0-10)               | 2<br>(1-3; 0-10)             | 1<br>(0-2; 0-10)               | 1<br>(0-2; 0-20)               | 1<br>(1-2; 0-3)                 | 1<br>(0-2; 0-20)                |
| Ankle surgeries<br>(median; IQR; min-max)                           | 0<br>(0-0; 0-5)                | 1<br>(0-2; 0-5)              | 0<br>(0-0; 0-5)                | 0<br>(0-0; 0-4)                | 1<br>(0-1; 0-2)                 | 0<br>(0-0; 0-4)                 |

1  
2  
3  
4  
5  
6  
7  
8  
9  
10  
11  
12  
13  
14  
15  
16  
17  
18  
19  
20  
21  
22  
23  
24  
25  
26  
27  
28  
29  
30  
31  
32  
33  
34  
35  
36  
37  
38  
39  
40  
41  
42  
43  
44  
45  
46  
47

---

\* Statistically significant difference between ankle OA and no ankle OA. Abbreviations: OA = Osteoarthritis; IQR = interquartile range; n = number

For peer review only



Table 2: Subcategories for prevalence of reported ankle OA, severe injuries and ankle surgeries in retired football and rugby players

|                                     | Football            |                         |                        | Rugby              |                        |                        |
|-------------------------------------|---------------------|-------------------------|------------------------|--------------------|------------------------|------------------------|
|                                     | Total<br>(n = 401)* | ≤ 40 years<br>(n = 271) | > 40 years<br>(n = 83) | Total<br>(n = 152) | ≤ 40 years<br>(n = 82) | > 40 years<br>(n = 66) |
| Prevalence ankle OA in % (95%CI)    | 9.2% (6.4 – 12.1)   | 8.5% (5.2 – 11.8)       | 12.0% (5.0 – 19.1)     | 4.6% (1.2 – 8.0)   | 2.4% (0.9 – 5.8)       | 4.5% (0.5 – 9.6)       |
|                                     | 0 ankle injuries    | 1 ankle injury          | > 1 ankle injury       | 0 ankle injuries   | 1 ankle injury         | > 1 ankle injury       |
| Severe ankle injuries total (% (n)) | 42.5% (156)         | 25.3% (93)              | 32.2% (118)            | 40.5% (60)         | 27.7% (41)             | 31.8% (47)             |
| - With ankle OA (% (n))             | 5.7% (2)            | 28.6% (10)              | 65.7% (23)             | 14.3% (1)          | 42.9% (3)              | 42.9% (3)              |
| - Without ankle OA (% (n))          | 46.4% (154)         | 25.0% (83)              | 28.6% (95)             | 41.8% (59)         | 27.0% (38)             | 31.2% (44)             |
|                                     | No ankle surgeries  | 1 ankle surgery         | > 1 ankle surgery      | No ankle surgeries | 1 ankle surgery        | > 1 ankle surgery      |
| Ankle surgeries total in % (n)      | 81.5% (299)         | 10.9% (40)              | 7.6% (28)              | 79.7% (118)        | 15.5% (23)             | 4.7% (7)               |
| - With ankle OA % (n)               | 38.2% (13)          | 29.4% (10)              | 32.4% (11)             | 42.9% (3)          | 42.9% (3)              | 14.3% (1)              |
| - Without ankle OA % (n)            | 85.9% (286)         | 9% (30)                 | 5.1% (17)              | 81.6% (115)        | 14.2% (20)             | 4.3% (6)               |

\*The sum of patients in the subcategories ≤ 40 years and > 40 years does not equal the "Total number of participants" due to missing data (regarding age).

Abbreviations: OA = Osteoarthritis; n = number; CI = confidence interval;

Table 3: Association (odds ratio and 95% CI) of severe ankle injury and ankle surgery with ankle osteoarthritis among recently retired professional football and rugby players

|                                    | Football (n = 401) |                       | Rugby (n = 152)  |                       |
|------------------------------------|--------------------|-----------------------|------------------|-----------------------|
|                                    | Unadjusted         | Adjusted <sup>ψ</sup> | Unadjusted       | Adjusted <sup>ψ</sup> |
| Severe ankle injury<br>(OR, 95%CI) | 1.34 (1.17-1.53)   | 1.33 (1.14-1.55)      | 1.01 (0.74-1.38) | 1.05 (0.75-1.47)      |
| Ankle surgery<br>(OR, 95%CI)       | 2.20 (1.61-3.00)   | 2.09 (1.41-3.08)      | 1.99 (0.92-4.3)  | 1.96 (0.81-4.71)      |

<sup>ψ</sup>Adjusted for age and body mass index (BMI); Abbreviations: OR = Odds Ratio; n = number; CI = confidence interval

229

231 **Mental and physical QoL**

232

233 For the PROMIS physical health score a statistically significant lower outcome was found for football (p = 0.01) and rugby players (p = 0.009) with  
234 OA (48 and 45 points respectively) compared to players without OA (51 and 51 points respectively). The PROMIS mental health score was not  
235 significantly different between players with OA vs players without OA. Data is presented in Table 4.

236

237

238

Table 4: Mental and physical quality of life (0-100) of recently retired football and rugby players with ankle OA compared to players without ankle OA

|                                                   | Football           |                           |                               |         | Rugby              |                          |                               |         |
|---------------------------------------------------|--------------------|---------------------------|-------------------------------|---------|--------------------|--------------------------|-------------------------------|---------|
|                                                   | Total<br>(n = 401) | With ankle OA<br>(n = 37) | Without ankle OA<br>(n = 364) | p-value | Total<br>(n = 152) | With ankle OA<br>(n = 7) | Without ankle OA<br>(n = 145) | p-value |
| PROMIS mental health<br>(median; IQR; min-max)    | 51; 46-56; 31-68   | 51; 46-53; 31-63          | 53; 46-56; 31-68              | 0.251   | 52; 46-56; 28-68   | 48; 48-53; 46-56         | 53; 46-56; 28-68              | 0.567   |
| PROMIS Physical health*<br>(median; IQR; min-max) | 51; 46-56; 27-68   | 48; 42-54; 35-62*         | 51; 48-58; 27-68*             | 0.010   | 51; 45-54; 30-68   | 45; 37-48; 37-51*        | 51; 37-56; 30-68*             | 0.009   |

\*Statistically significant difference; Abbreviations: OA = Osteoarthritis; IQR = Interquartile range; n = number

239

240

1  
2  
3 241 **Post-hoc analysis**  
4

5 242 In the literature, forced retirement is a risk factor for post-career mental health symptoms.<sup>26</sup> Following  
6  
7 243 data analysis, we were concerned by the seemingly high percentage of football and rugby players who  
8  
9 244 stopped due to a career ending injury. As we were analysing the impact ankle OA had on QoL, we felt  
10  
11 245 the effect of a career ending injury on QoL to be in line with our initial objectives. Consequently we  
12  
13 246 performed a post-hoc analysis to determine any associations between reported forced retirement and  
14  
15 247 mental and physical PROMIS health scores. In this study, 31% of players reported to have been forced to  
16  
17 248 retire, specifically: 29% of football players and 36% of rugby players.  
18  
19  
20

21 249  
22  
23 250 The post-hoc sub-analysis of all players regarding mental and physical health scores associated with  
24  
25 251 voluntary retirement and in conjunction with ankle OA is presented in Table 5. No post-hoc sub-analysis  
26  
27 252 was done for football and rugby players separately, regarding voluntary retirement in conjunction with  
28  
29 253 ankle OA, due to the low number of ankle OA cases among rugby players. However mental and physical  
30  
31 254 health scores in football and rugby due to forced retirement is presented separately in Table 5.  
32  
33  
34

35 255

36 256  
37  
38  
39  
40  
41  
42  
43  
44  
45  
46  
47  
48  
49  
50  
51  
52  
53  
54  
55  
56  
57  
58  
59  
60

257

Table 5: Post-Hoc analysis regarding mental and physical quality of life of recently retired football and rugby players who reported to have been forced to retire, and quality of life of players who reported to have been forced to retire with ankle OA compared to players without ankle OA

|                                                  | <b>PROMIS mental health</b><br>(median; IQR; min-max) | <b>p-value</b> | <b>PROMIS physical health</b><br>(median; IQR; min-max) | <b>p-value</b> |
|--------------------------------------------------|-------------------------------------------------------|----------------|---------------------------------------------------------|----------------|
| <i>Total</i>                                     |                                                       |                |                                                         |                |
| <i>Voluntarily retired*</i><br>(n = 369)         | 53; 48-56; 31-68*                                     |                | 54; 48-58; 30-68*                                       |                |
| <i>Forced to retire*</i><br>(n = 168)            | 48; 44-53; 28-68*                                     | p < 0.001      | 48; 42-51; 27-68*                                       | p < 0.001      |
| <i>Voluntarily retired with OA* (n = 30)</i>     | 51; 46-53; 36-63                                      |                | 51; 45-54; 35-62*                                       |                |
| <i>Voluntarily retired without OA* (n = 339)</i> | 53; 48-59; 31-68                                      | p = 0.074      | 54; 48-58; 30-68*                                       | p = 0.001      |
| <i>Forced to retire with OA (n = 14)</i>         | 48; 46-55; 31-63                                      |                | 42; 40-46; 37-58                                        |                |
| <i>Forced to retire without OA (n = 154)</i>     | 48; 44-53; 28-68                                      | p = 0.841      | 48; 42-52; 27-68                                        | p = 0.159      |
| <i>Football*</i>                                 |                                                       |                |                                                         |                |
| <i>Voluntarily retired*</i><br>(n = 272)         | 53; 48-56; 31-68*                                     |                | 54; 48-58; 30-68*                                       |                |
| <i>Forced to retire*</i><br>(n = 113)            | 48; 44-53; 31-63*                                     | p < 0.001      | 48; 42-51; 27-62*                                       | p < 0.001      |
| <i>Rugby*</i>                                    |                                                       |                |                                                         |                |
| <i>Voluntarily retired*</i><br>(n = 97)          | 53; 48-56; 31-68*                                     |                | 54; 48-58; 35-68*                                       |                |
| <i>Forced to retire*</i><br>(n = 55)             | 48; 44-56; 28-68*                                     | p = 0.018      | 48; 37-54; 30-68*                                       | p < 0.001      |

\*Statistically significant difference; Abbreviations: IQR = Interquartile range; OA = Osteoarthritis; n = number

258

## 260 **Discussion**

261 Our most important findings were that (i) the prevalence of ankle OA among former professional  
262 football and rugby players was, 9.2% (95%CI 6.4 –12.1) and 4.6% (95%CI (1.2 – 8.0), respectively; (ii)  
263 previous severe ankle injuries and ankle surgeries are associated with ankle OA among former  
264 professional football players; and (iii) ankle OA does not lead to reduced mental or physical QoL in  
265 former professional football and rugby players.

266

### 267 **Ankle OA in football and rugby compared to other sports and the general population**

268 Several studies have reported symptomatic ankle OA prevalence among a variety of former elite  
269 athletes, ranging from 0% in volleyball (n = 22), long distance running (n = 30), elite high-jump (n = 30)  
270 and ballet (n = 27) to 10% among former military parachutists (n = 40).<sup>27–31</sup> In our study, the prevalence  
271 of ankle OA among former professional football (9.2%) and rugby players (4.6%) was higher than the  
272 estimated prevalence among the general population (3.4 %).<sup>12</sup> Murray et al. (2018) invited participants  
273 with self-reported ankle pain (11.7%) from the general population for a radiograph (radiological atlas of  
274 Foot OA).<sup>12,32</sup>

275

276 Our study reports a lower ankle OA prevalence compared to previous studies among former  
277 professional football players (12-19%).<sup>13–15</sup> In these studies, data was similarly collected using cross-  
278 sectional retrospective self-reported questionnaires.<sup>13,14</sup> No previous data is available concerning ankle  
279 OA among former professional rugby players. The low ankle OA prevalence among rugby players in this  
280 study is likely due to either an under reporting of ankle OA among rugby players or a type II error.

281

### 282 ***Association of severe ankle injuries and ankle surgeries with ankle OA***

283 In our study, football players were 1.3 (95%CI: 1.1 - 1.6) and 2.1 (95%CI: 1.4 – 3.1) times more likely to  
284 develop ankle OA for every ankle injury and ankle surgery, respectively. This is in line with previous

1  
2  
3 285 studies that showed an association between ankle OA and ankle injuries, stating traumatic ankle injuries  
4  
5 286 to be the main cause of ankle OA (70-78%).<sup>6,7</sup> Consequences of ankle injuries are thought to be due to  
6  
7 287 either direct damage the articular surfaces or change in ankle joint biomechanics (e.g. through chronic  
8  
9 288 ankle instability due to ankle ligament damage).<sup>33</sup> No association was seen for severe ankle injuries or  
10  
11 289 ankle surgeries and ankle OA among rugby players. Although the best estimate for the association of  
12  
13 290 ankle surgeries and OA is similar to football (OR = 2), the 95%CI includes 1 (0.8 – 4.7). This may be due  
14  
15 291 to insufficient power among rugby players, as only 7 reported ankle OA.  
16  
17  
18  
19  
20

### 21 293 ***Health-related quality of life***

22  
23 294 Filbay et al. (2019) reported factors such as age, type of sport (contact/collision sports), OA and  
24  
25 295 involuntary retirement from sport to possibly negatively impact QoL.<sup>26,34–36</sup> However the positive  
26  
27 296 impacts associated with elite sport participation, such as pride of accomplishments, social network  
28  
29 297 (through sport participation) and coping and adjustment to musculoskeletal pain (due to resilience and  
30  
31 298 determination), may persist and even compensate reduced physical QOL beyond retirement of the  
32  
33 299 player's athletic career.<sup>34</sup>  
34  
35  
36  
37 300  
38  
39 301 Our post-hoc sub-analysis revealed 29% of football players and 36% of rugby players were forced to  
40  
41 302 retire. Although we reported several instances of statistically significant differences in our study for both  
42  
43 303 physical and mental PROMIS health scores, all were similar to the estimated norm for the general  
44  
45 304 population (50 points). Unfortunately, there is no robust minimally clinically important difference  
46  
47 305 (MCID) threshold for the PROMIS-10 global short form applicable for this population. Consequently, it is  
48  
49 306 difficult to interpret the results. Nevertheless, although statistically significant, the PROMIS mental and  
50  
51 307 physical health scores observed, for both football and rugby players, are unlikely clinically significant.  
52  
53  
54  
55  
56  
57  
58  
59  
60

1  
2  
3 308 Based on our data, ankle OA does not lead to reduced mental or physical QoL in former professional  
4  
5 309 football and rugby players.  
6

7  
8 310

9  
10 311 ***Strengths and limitations***

11  
12 312 We had an overall good response rate (56%) and a large group of participating football players (401).

13  
14 313 However, several limitations should be mentioned. Firstly, this study had a cross-sectional design,

15  
16 314 therefore no causal-association can be determined. Secondly, there were only 7 rugby players with OA,

17  
18 315 implying a potential serious type II error. Thirdly, recruitment procedures were blinded to the research

19  
20 316 team, a non-response analysis could not be performed. Fourthly, research based (retrospective)

21  
22 317 questionnaires are dependent on the accuracy and understanding of the participant. Professional

23  
24 318 athletes might generally remember the number of severe ankle injuries or surgeries resulting in a

25  
26 319 training or match absence of  $\geq 4$  weeks. However, we cannot exclude that participants were not able to

27  
28 320 precisely recall all their sustained severe ankle injuries and ankle surgeries or that they did not consult

29  
30 321 their most recent medical professional. Finally, our OA definition did not include a clinical and

31  
32 322 radiological evaluation.  
33

34  
35 323

36  
37 324 ***Implications for practice***

38  
39 325 The epidemiological data from this study regarding ankle OA prevalence among former professional

40  
41 326 football and rugby players, and its association with both severe ankle injuries and ankle surgeries, is an

42  
43 327 essential part of protecting the athlete's health. In both professional football and rugby, a higher

44  
45 328 prevalence of ankle OA can be expected compared to the general population. Furthermore, As the

46  
47 329 majority are post-traumatic, preventive measures and adequate rehabilitation are recommended.

48  
49 330 Awareness should be raised, regarding the increased risk of developing ankle OA following each ankle

50  
51 331 injury and surgery. Additionally primary and secondary prevention programmes should be implemented.  
52  
53  
54  
55  
56  
57  
58  
59  
60



1  
2  
3 332 Exercise based prevention intervention programs, such as the FIFA11+ in football and the movement  
4  
5 333 control injury prevention programme in rugby, have found reduced ankle injury incidence and  
6  
7 334 burden.<sup>37,38</sup> Finally, management of ankle OA is key for retired players, focusing on healthy lifestyle  
8  
9  
10 335 including physical activity, pain alleviation, function and minimising disability.<sup>39-41</sup> With this intention,  
11  
12 336 FIFPRO has developed an "After Career Consultation".<sup>42</sup> Future studies will evaluate its relevance.  
13

14 337

### 16 338 **Conclusion**

18 339 This cross-sectional study found an athlete reported ankle OA prevalence of 9.2% and 4.6% among  
19  
20 340 recently retired professional football and rugby players, respectively. Severe ankle injuries and ankle  
21  
22 341 surgeries were associated with a higher prevalence of ankle OA in former professional football players.  
23  
24 342 No clinically relevant differences in QoL were reported in players with OA compared to players without  
25  
26 343 OA. As a higher prevalence of ankle OA can be expected in both professional football and rugby  
27  
28 344 compared to the general population, and the majority are post-traumatic, primary and secondary  
29  
30 345 preventive measures for ankle injuries and an optimal diagnosis and treatment plan are recommended.  
31  
32  
33

34 346

### 36 347 **Acknowledgements**

38 348 The Authors would like to thank all football and rugby players' associations involved. The authors are  
39  
40 349 grateful to all retired professional football and rugby players who participated in the study.  
41  
42

43 350

### 45 351 **Contributorship statement**

47 352 Authorship was determined according to the ICMJE authorship recommendations. All authors (LP, HA,  
48  
49 353 SK, ML, CR, KS, WV, GR, JT, GK, VG) were involved in the design of the study, data analysis and  
50  
51 354 data interpretation. VG and GK were responsible for data collection. LP drafted the manuscript, with  
52  
53 355 critical review provided by all authors (LP, HA, SK, ML, CR, KS, WV, GR, JT, GK, VG). All  
54  
55  
56  
57  
58  
59

1  
2  
3 356 authors approved the final version of the manuscript (LP, HA, SK, ML, CR, KS, WV, GR, JT, GK,  
4  
5 357 VG).

6  
7  
8 358

9  
10 359 **Funding**

11  
12 360 This research received no specific grant from any funding agency in the public, commercial or non-profit  
13  
14 361 sectors.

15  
16  
17 362

18  
19 363 **Competing interests**

20  
21 364 None declared.

22  
23 365

24  
25  
26 366 **Ethics approval**

27  
28 367 Ethical approval for the study was provided by the Ethical Committee of the Yokohama City Sports

29  
30 368 Medical Center (17.003; Yokohama, Japan) and the Medical Ethics Review Committee of the Academic

31  
32 369 Medical Center (W16\_366#16.431; Amsterdam, The Netherlands)

33  
34  
35 370

36  
37 371 **Data sharing statement**

38  
39 372 No additional data available

40  
41 373

42  
43  
44 374  
45  
46  
47  
48  
49  
50  
51  
52  
53  
54  
55  
56  
57  
58  
59  
60

375 **References**

- 376 1. Sankey RA, Brooks JHM, Kemp SPT, Haddad FS. The epidemiology of ankle injuries in professional  
377 rugby union players. *Am J Sports Med.* 2008. doi:10.1177/0363546508322889
- 378 2. Waldén M, Hägglund M, Ekstrand J. Time-trends and circumstances surrounding ankle injuries in  
379 men's professional football: An 11-year follow-up of the UEFA Champions League injury study. *Br*  
380 *J Sports Med.* 2013. doi:10.1136/bjsports-2013-092223
- 381 3. Fuller CW, Taylor A, Kemp SPT, Raftery M. Rugby World Cup 2015: World Rugby injury  
382 surveillance study. *Br J Sports Med.* 2017;51(1):51-57. doi:10.1136/bjsports-2016-096275
- 383 4. Ekstrand J, Krutsch W, Spreco A, et al. Time before return to play for the most common injuries in  
384 professional football: a 16-year follow-up of the UEFA Elite Club Injury Study. *Br J Sports Med.*  
385 2019;bjsports-2019-100666. doi:10.1136/bjsports-2019-100666
- 386 5. Williams S, Trewartha G, Kemp S, Stokes K. A meta-analysis of injuries in senior men's  
387 professional Rugby Union. *Sport Med.* 2013. doi:10.1007/s40279-013-0078-1
- 388 6. Valderrabano V, Horisberger M, Russell I, Dougall H, Hintermann B. Etiology of ankle  
389 osteoarthritis. *Clin Orthop Relat Res.* 2009. doi:10.1007/s11999-008-0543-6
- 390 7. Saltzman CL, Salamon ML, Blanchard GM, et al. Epidemiology of ankle arthritis: report of a  
391 consecutive series of 639 patients from a tertiary orthopaedic center. *Iowa Orthop J.* 2005.
- 392 8. Drawer S, Fuller CW. Evaluating the level of injury in English professional football using a risk  
393 based assessment process. *Br J Sports Med.* 2002. doi:10.1136/bjism.36.6.446
- 394 9. Bathgate A, Best JP, Craig G, Jamieson M. A prospective study of injuries to elite Australian rugby  
395 union players. *Br J Sports Med.* 2002. doi:10.1136/bjism.36.4.265
- 396 10. Garraway WM, Lee AJ, Hutton SJ, Russell EBAW, Macleod DAD. Impact of professionalism on  
397 injuries in rugby union. *Br J Sports Med.* 2000. doi:10.1136/bjism.34.5.348
- 398 11. Brooks JHM, Fuller CW, Kemp SPT, Reddin DB. Epidemiology of injuries in English professional

- 1  
2  
3 399 rugby union: Part 1 match injuries. *Br J Sports Med*. 2005. doi:10.1136/bjism.2005.018135  
4  
5 400 12. Murray C, Marshall M, Rathod T, Bowen CJ, Menz HB, Roddy E. Population prevalence and  
6  
7 401 distribution of ankle pain and symptomatic radiographic ankle osteoarthritis in community  
8  
9 402 dwelling older adults: A systematic review and cross-sectional study. *PLoS One*. 2018.  
10  
11 403 doi:10.1371/journal.pone.0193662  
12  
13  
14 404 13. Drawer S, Fuller CW. Propensity for osteoarthritis and lower limb joint pain in retired professional  
15  
16 405 soccer players. *Br J Sports Med*. 2001. doi:10.1136/bjism.35.6.402  
17  
18 406 14. Turner AP, Barlow JH, Heathcote-Elliot C. Long term health impact of playing professional football  
19  
20 407 in the United Kingdom. *Br J Sports Med*. 2000. doi:10.1136/bjism.34.5.332  
21  
22  
23 408 15. Kuijt MTK, Inklaar H, Gouttebauge V, Frings-Dresen MHW. Knee and ankle osteoarthritis in former  
24  
25 409 elite soccer players: A systematic review of the recent literature. *J Sci Med Sport*. 2012.  
26  
27 410 doi:10.1016/j.jsams.2012.02.008  
28  
29  
30 411 16. Davies MAM, Judge DA, Delmestri A, et al. Health amongst former rugby union players: A cross-  
31  
32 412 sectional study of morbidity and health-related quality of life. *Sci Rep*. 2017. doi:10.1038/s41598-  
33  
34 413 017-12130-y  
35  
36  
37 414 17. Schuring N, Aoki H, Gray J, Kerkhoffs GMMJ, Lambert M, Gouttebauge V. Osteoarthritis is  
38  
39 415 associated with symptoms of common mental disorders among former elite athletes. *Knee*  
40  
41 416 *Surgery, Sport Traumatol Arthrosc*. 2017. doi:10.1007/s00167-016-4255-2  
42  
43  
44 417 18. Gouttebauge V, Inklaar H, Frings-Dresen MHW. Risk and consequences of osteoarthritis after a  
45  
46 418 professional football career: A systematic review of the recent literature. *J Sports Med Phys*  
47  
48 419 *Fitness*. 2014.  
49  
50 420 19. Vandembroucke JP, von Elm E, Altman DG, et al. Strengthening the Reporting of Observational  
51  
52 421 Studies in Epidemiology (STROBE): Explanation and elaboration. *Int J Surg*. 2014.  
53  
54 422 doi:10.1016/j.ijsu.2014.07.014  
55  
56  
57  
58  
59  
60

- 1  
2  
3 423 20. Woodward M. *Epidemiology: Study Design and Data Analysis, Third Edition.*; 2013.  
4  
5 424 21. National Institute for Health and Care Excellence. National Clinical Guideline Centre Osteoarthritis  
6  
7 425 Care and management in adults. 2014;(February):1-505.  
8  
9  
10 426 22. Hays RD, Bjorner JB, Revicki DA, Spritzer KL, Cella D. Development of physical and mental health  
11  
12 427 summary scores from the patient-reported outcomes measurement information system  
13  
14 428 (PROMIS) global items. *Qual Life Res.* 2009. doi:10.1007/s11136-009-9496-9  
15  
16 429 23. Song K, Wikstrom EA, Tennant JN, Guskiewicz KM, Marshall SW, Kerr ZY. Osteoarthritis  
17  
18 430 Prevalence in Retired National Football League Players With a History of Ankle Injuries and  
19  
20 431 Surgery. *J Athl Train.* 2019. doi:10.4085/1062-6050-421-18  
21  
22  
23 432 24. Felson DT. An update on the pathogenesis and epidemiology of osteoarthritis. *Radiol Clin North*  
24  
25 433 *Am.* 2004. doi:10.1016/S0033-8389(03)00161-1  
26  
27  
28 434 25. DJ H, JJ M, FJ K. The symptoms of osteoarthritis and the genesis of pain. *Med Clin North Am.*  
29  
30 435 2009. doi:10.1016/j.mcna.2008.08.008  
31  
32 436 26. Gouttebauge V, Castaldelli-Maia JM, Gorczynski P, et al. Occurrence of mental health symptoms  
33  
34 437 and disorders in current and former elite athletes: A systematic review and meta-analysis. *Br J*  
35  
36 438 *Sports Med.* 2019. doi:10.1136/bjsports-2019-100671  
37  
38  
39 439 27. Gross P, Marti B. Risk of degenerative ankle joint disease in volleyball players: Study of former  
40  
41 440 elite athletes. *Int J Sports Med.* 1999. doi:10.1055/s-2007-971094  
42  
43 441 28. Konradsen L, Berg Hansen EM, Søndergaard L. Long distance running and osteoarthritis. *Am J*  
44  
45 442 *Sports Med.* 1990. doi:10.1177/036354659001800408  
46  
47  
48 443 29. Schmitt H, Lemke JM, Brocai DRC, Parsch D. Degenerative changes in the ankle in former elite  
49  
50 444 high jumpers. *Clin J Sport Med.* 2003. doi:10.1097/00042752-200301000-00002  
51  
52 445 30. Niek Van Dijk C, Lim LSL, Poortman A, Strübbe EH, Marti RK. Degenerative Joint Disease in Female  
53  
54 446 Ballet Dancers. *Am J Sports Med.* 1995. doi:10.1177/036354659502300307  
55  
56  
57  
58  
59  
60

- 1  
2  
3 447 31. Murray Leslie CF, Lintott DJ, Wright V. The knees and ankles in sport and veteran military  
4  
5 448 parachutists. *Ann Rheum Dis*. 1977. doi:10.1136/ard.36.4.327  
6  
7 449 32. Menz HB, Munteanu SE, Landorf KB, Zammit G V., Cicuttini FM. Radiographic classification of  
8  
9 450 osteoarthritis in commonly affected joints of the foot. *Osteoarthr Cartil*. 2007.  
10  
11 451 doi:10.1016/j.joca.2007.05.007  
12  
13  
14 452 33. Wikstrom EA, Hubbard-Turner T, McKeon PO. Understanding and Treating Lateral Ankle Sprains  
15  
16 453 and their Consequences: A Constraints-Based Approach. *Sport Med*. 2013. doi:10.1007/s40279-  
17  
18 454 013-0043-z  
19  
20  
21 455 34. Filbay S, Pandya T, Thomas B, McKay C, Adams J, Arden N. Quality of Life and Life Satisfaction in  
22  
23 456 Former Athletes: A Systematic Review and Meta-Analysis. *Sport Med*. 2019;(0123456789).  
24  
25 457 doi:10.1007/s40279-019-01163-0  
26  
27  
28 458 35. Arnold R, Fletcher D. A Research Synthesis and Taxonomic Classification of the Organizational  
29  
30 459 Stressors Encountered by Sport Performers. *J Sport Exerc Psychol*. 2016.  
31  
32 460 doi:10.1123/jsep.34.3.397  
33  
34  
35 461 36. Wylleman P, Reints A. A lifespan perspective on the career of talented and elite athletes:  
36  
37 462 Perspectives on high-intensity sports. *Scand J Med Sci Sport*. 2010. doi:10.1111/j.1600-  
38  
39 463 0838.2010.01194.x  
40  
41 464 37. Nouni-Garcia R, Carratala-Munuera C, Orozco-Beltran D, Lopez-Pineda A, Asensio-Garcia MR, Gil-  
42  
43 465 Guillen VF. Clinical benefit of the FIFA 11 programme for the prevention of hamstring and lateral  
44  
45 466 ankle ligament injuries among amateur soccer players. *Inj Prev*. 2018. doi:10.1136/injuryprev-  
46  
47 467 2016-042267  
48  
49  
50 468 38. Attwood MJ, Roberts SP, Trewartha G, England ME, Stokes KA. Efficacy of a movement control  
51  
52 469 injury prevention programme in adult men's community rugby union: a cluster randomised  
53  
54 470 controlled trial. *Br J Sports Med*. 2018. doi:10.1136/bjsports-2017-098005  
55  
56  
57  
58  
59  
60

- 1  
2  
3 471 39. Kirkendall DT, Garrett WE. Management of the Retired Athlete with Osteoarthritis of the Knee.  
4  
5 472 *Cartilage*. 2012. doi:10.1177/1947603511408287  
6  
7 473 40. McAlindon TE, Bannuru RR, Sullivan MC, et al. OARSI guidelines for the non-surgical management  
8  
9 of knee osteoarthritis. *Osteoarthr Cartil*. 2014. doi:10.1016/j.joca.2014.01.003  
10 474  
11  
12 475 41. Paterson KL, Gates L. Clinical Assessment and Management of Foot and Ankle Osteoarthritis: A  
13  
14 476 Review of Current Evidence and Focus on Pharmacological Treatment. *Drugs and Aging*. 2019.  
15  
16 477 doi:10.1007/s40266-019-00639-y  
17  
18 478 42. Gouttebargé V, Goedhart E, Kerkhoffs G. Empowering the health of retired professional  
19  
20 footballers: The systematic development of an after Career Consultation and its feasibility. *BMJ*  
21 479  
22 *Open Sport Exerc Med*. 2018. doi:10.1136/bmjsem-2018-000466  
23 480  
24  
25  
26 481  
27  
28 482

STROBE Statement—Checklist of items that should be included in reports of *cross-sectional studies*

|                              | Item No | Recommendation                                                                                                                                                                                                                                                                                                                                                                  |
|------------------------------|---------|---------------------------------------------------------------------------------------------------------------------------------------------------------------------------------------------------------------------------------------------------------------------------------------------------------------------------------------------------------------------------------|
| <b>Title and abstract</b>    | 1       | (a) Indicate the study's design with a commonly used term in the title or the abstract – ✓<br>(b) Provide in the abstract an informative and balanced summary of what was done and what was found – ✓                                                                                                                                                                           |
| <b>Introduction</b>          |         |                                                                                                                                                                                                                                                                                                                                                                                 |
| Background/rationale         | 2       | Explain the scientific background and rationale for the investigation being reported – ✓: p. 4 line 64 – 96                                                                                                                                                                                                                                                                     |
| Objectives                   | 3       | State specific objectives, including any prespecified hypotheses – ✓: p. 4 line 98 – 104                                                                                                                                                                                                                                                                                        |
| <b>Methods</b>               |         |                                                                                                                                                                                                                                                                                                                                                                                 |
| Study design                 | 4       | Present key elements of study design early in the paper – ✓: p. 6 line 108 – 114                                                                                                                                                                                                                                                                                                |
| Setting                      | 5       | Describe the setting, locations, and relevant dates, including periods of recruitment, exposure, follow-up, and data collection – ✓: p. 6 line 116 – 133                                                                                                                                                                                                                        |
| Participants                 | 6       | (a) Give the eligibility criteria, and the sources and methods of selection of participants – ✓: p. 6 line 116 – 133                                                                                                                                                                                                                                                            |
| Variables                    | 7       | Clearly define all outcomes, exposures, predictors, potential confounders, and effect modifiers. Give diagnostic criteria, if applicable – ✓: p. 6 line 135 – 159                                                                                                                                                                                                               |
| Data sources/<br>measurement | 8*      | For each variable of interest, give sources of data and details of methods of assessment (measurement). Describe comparability of assessment methods if there is more than one group – ✓: p. 6 line 161 – 172                                                                                                                                                                   |
| Bias                         | 9       | Describe any efforts to address potential sources of bias – ✓: p. 6 line 117                                                                                                                                                                                                                                                                                                    |
| Study size                   | 10      | Explain how the study size was arrived at – ✓: p. 6 – 7 line 130 – 133                                                                                                                                                                                                                                                                                                          |
| Quantitative variables       | 11      | Explain how quantitative variables were handled in the analyses. If applicable, describe which groupings were chosen and why – ✓: p. 8-9 line 175 – 188                                                                                                                                                                                                                         |
| Statistical methods          | 12      | (a) Describe all statistical methods, including those used to control for confounding<br>(b) Describe any methods used to examine subgroups and interactions<br>(c) Explain how missing data were addressed<br>(d) If applicable, describe analytical methods taking account of sampling strategy<br>(e) Describe any sensitivity analyses<br>– ✓: <b>p. 8-9 line 175 – 188</b> |
| <b>Results</b>               |         |                                                                                                                                                                                                                                                                                                                                                                                 |
| Participants                 | 13*     | (a) Report numbers of individuals at each stage of study—eg numbers potentially eligible, examined for eligibility, confirmed eligible, included in the study, completing follow-up, and analysed – ✓: <b>p. 10 line 192 – 196</b><br>(b) Give reasons for non-participation at each stage – ✓: <b>p. 10 line 192 – 196</b><br>(c) Consider use of a flow diagram               |
| Descriptive data             | 14*     | (a) Give characteristics of study participants (eg demographic, clinical, social) and information on exposures and potential confounders – ✓: <b>p 11 table 1</b><br>(b) Indicate number of participants with missing data for each variable of interest                                                                                                                        |
| Outcome data                 | 15*     | Report numbers of outcome events or summary measures – ✓: <b>p 11 – 14, table 2 -4</b>                                                                                                                                                                                                                                                                                          |
| Main results                 | 16      | (a) Give unadjusted estimates and, if applicable, confounder-adjusted estimates and their precision (eg, 95% confidence interval). Make clear which confounders were adjusted for and why they were included – ✓: <b>p 11 – 14, table 2 -4</b><br>(b) Report category boundaries when continuous variables were categorized                                                     |



1  
2  
3  
4  
5  
6  
7  
8  
9  
10  
11  
12  
13  
14  
15  
16  
17  
18  
19  
20  
21  
22  
23  
24  
25  
26  
27  
28  
29  
30  
31  
32  
33  
34  
35  
36  
37  
38  
39  
40  
41  
42  
43  
44  
45  
46  
47  
48  
49  
50  
51  
52  
53  
54  
55  
56  
57  
58  
59  
60

(c) If relevant, consider translating estimates of relative risk into absolute risk for a meaningful time period

|                          |    |                                                                                                                                                                                                                  |
|--------------------------|----|------------------------------------------------------------------------------------------------------------------------------------------------------------------------------------------------------------------|
| Other analyses           | 17 | Report other analyses done—eg analyses of subgroups and interactions, and sensitivity analyses – √: <b>p 15, line 227 – 237 + p 16 table 5</b>                                                                   |
| <b>Discussion</b>        |    |                                                                                                                                                                                                                  |
| Key results              | 18 | Summarise key results with reference to study objectives – √: <b>p 17, line 242 - 245</b>                                                                                                                        |
| Limitations              | 19 | Discuss limitations of the study, taking into account sources of potential bias or imprecision. Discuss both direction and magnitude of any potential bias – √: <b>p 3, line 53 - 62</b>                         |
| Interpretation           | 20 | Give a cautious overall interpretation of results considering objectives, limitations, multiplicity of analyses, results from similar studies, and other relevant evidence – √: <b>p 19 - 20, line 293 - 317</b> |
| Generalisability         | 21 | Discuss the generalisability (external validity) of the study results <b>p 19 - 20, line 293 - 305</b>                                                                                                           |
| <b>Other information</b> |    |                                                                                                                                                                                                                  |
| Funding                  | 22 | Give the source of funding and the role of the funders for the present study and, if applicable, for the original study on which the present article is based <b>p 21, line 339 - 340</b>                        |

\*Give information separately for exposed and unexposed groups.

**Note:** An Explanation and Elaboration article discusses each checklist item and gives methodological background and published examples of transparent reporting. The STROBE checklist is best used in conjunction with this article (freely available on the Web sites of PLoS Medicine at <http://www.plosmedicine.org/>, Annals of Internal Medicine at <http://www.annals.org/>, and Epidemiology at <http://www.epidem.com/>). Information on the STROBE Initiative is available at [www.strobe-statement.org](http://www.strobe-statement.org).
