# Supplementary material for: Ankle osteoarthritis and its association with severe ankle injuries, ankle surgeries and health-related quality of life in recently retired professional male football and rugby players: a cross-sectional observational study
Source: PubMed Central journal article supplement (PMC7310999; doi:10.1136/bmjopen-2020-036775), 2020-06-21
Supplement: bmjopen-2020-036775.reviewer_comments.pdf [file bmjopen-2020-036775.reviewer_comments.pdf]

## PEER REVIEW HISTORY

BMJ Open publishes all reviews undertaken for accepted manuscripts. Reviewers are asked to complete a checklist review form (<http://bmjopen.bmj.com/site/about/resources/checklist.pdf>) and are provided with free text boxes to elaborate on their assessment. These free text comments are reproduced below.

### ARTICLE DETAILS

|                            |                                                                                                                                                                                                                                 |
|----------------------------|---------------------------------------------------------------------------------------------------------------------------------------------------------------------------------------------------------------------------------|
| <b>TITLE (PROVISIONAL)</b> | Ankle osteoarthritis and its association with severe ankle injuries, ankle surgeries and health-related quality of life in recently retired professional male football and rugby players: A Cross-sectional observational study |
| <b>AUTHORS</b>             | Paget, Liam; Aoki, Haruhito; Kemp, Simon; Lambert, Mike; Readhead, Clint; Stokes, Keith; Viljoen, Wayne; Reurink, G; Tol, J; Kerkhoffs, Gino; Gouttebauge, Vincent                                                              |

### VERSION 1 – REVIEW

|                        |                                                         |
|------------------------|---------------------------------------------------------|
| <b>REVIEWER</b>        | Kade Paterson<br>The University of Melbourne, Australia |
| <b>REVIEW RETURNED</b> | 18-Feb-2020                                             |

|                         |                                                                                  |
|-------------------------|----------------------------------------------------------------------------------|
| <b>GENERAL COMMENTS</b> | The authors have done a good job responding to my previous concerns - well done. |
|-------------------------|----------------------------------------------------------------------------------|

### VERSION 1 – AUTHOR RESPONSE

Reviewer 1 comment: The authors have done a good job responding to my previous concerns - well done.

Response to reviewer 1: We thank the reviewer for their kind words
